# Supplementary material for: Smoking-by-genotype interaction in type 2 diabetes risk and fasting glucose
Source: PLoS One. 2020 May 7;15(5):e0230815. doi: 10.1371/journal.pone.0230815 (PMC7205201; doi:10.1371/journal.pone.0230815)
Supplement: S2 Table — (XLSX) [file pone.0230815.s002.xlsx]

## Sheet: Supplementary Table 2
Supplementary Table 2: SNPs meeting p<10-3 significance threshold for potential locus-smoking interaction for incident T2D in discovery stage analyses among EA individuals and AA individuals
SNP	Aim	Race	CHR	POS	A1	A2	d_beta_main	d_p_main	d_beta_int	d_p_int	d_p_joint	d_beta_ever	d_p_ever	d_beta_never	d_p_never	r_beta_main	r_p_main	r_beta_int	r_p_int	r_p_joint	r_beta_ever	r_p_ever	r_beta_never	r_p_never	dr_beta_main	dr_p_main	dr_beta_int	dr_p_int	dr_p_joint	dr_beta_ever	dr_p_ever	dr_beta_never	dr_p_never
rs3753340	1	1	1	1206921	A	G	0.2633	0.03311	0.8821	0.008095	0.0007054	0.4923	0.0002238	-0.2564	0.4075	-0.0757	0.1515	-0.1224	0.3482	0.2193	-0.1891	0.08441	-0.0522	0.3739	-0.0224	0.6435	0.0125	0.9182	0.2215	0.0901	0.2847	-0.0592	0.3049
rs17037397	1	1	1	11784750	A	C	0.3108	0.03356	0.894	0.008972	0.0009499	0.5071	0.001178	-0.3567	0.2503	0.039	0.03357	-0.0046	0.9073	0.112	0.0245	0.4913	0.0414	0.04857	0.0433	0.01718	0.0078	0.845	0.05127	0.0504	0.1473	0.0395	0.05931
rs3026868	1	1	1	21470723	T	C	-0.007	0.9187	-0.4883	0.0002168	0.0007522	-0.1961	0.02608	0.3117	0.002436	-0.0153	0.2115	-0.0225	0.45	0.3978	-0.0252	0.3324	-0.0119	0.3916	-0.0151	0.2106	-0.0451	0.1196	0.2244	-0.0395	0.1134	-0.0061	0.6611
rs493098	1	1	1	66444541	C	G	-0.0552	0.2057	0.3159	0.0005491	0.0009344	0.0588	0.2753	-0.266	0.0003711	0.0126	0.1062	0.0324	0.08817	0.04137	0.0416	0.01073	0.0034	0.6994	0.0105	0.1718	0.0442	0.01731	0.02892	0.0431	0.0057	-0.0004	0.9646
rs10874805	1	1	1	94120424	C	G	0.3963	0.006161	-0.3878	0.1759	0.002553	0.2119	0.2879	0.6859	0.0006993	-0.0488	0.1568	-0.0919	0.301	0.1154	-0.1391	0.06297	-0.0313	0.3992	-0.0247	0.4604	-0.1179	0.1646	0.3599	-0.0953	0.1728	-0.0074	0.8392
rs12746702	1	1	1	101470976	A	C	-0.2576	0.001423	-0.2312	0.1893	0.00162	-0.3386	0.0005715	-0.1443	0.3169	-0.0047	0.7921	0.045	0.3039	0.7248	0.0166	0.6666	-0.0092	0.6469	-0.0167	0.3397	0.0286	0.5008	0.6298	-0.0315	0.3783	-0.0117	0.5577
rs12758323	1	1	1	116098300	A	C	-0.0047	0.9495	-0.5772	0.0005624	0.003158	-0.1602	0.05437	0.4177	0.004821	-0.0063	0.6538	-0.0088	0.7878	0.9117	-0.0178	0.5374	-0.0037	0.8139	-0.0061	0.6538	-0.0301	0.3504	0.6677	-0.0331	0.223	0.0011	0.9421
rs6413452	1	1	1	159459058	T	C	0.3388	0.2345	-1.4528	0.06213	0.004	NA	NA	1.1433	0.0005624	0.0362	0.4838	-0.0797	0.6467	0.7442	-0.0414	0.8045	0.0384	0.4495	0.0462	0.3633	-0.1469	0.3867	0.4334	-0.0414	0.8045	0.0655	0.1914
rs9332621	1	1	1	167765288	T	C	0.4434	0.0009737	0.7248	0.02664	0.0001057	0.6726	2.201e-05	0.0188	0.9449	NA	NA	NA	NA	NA	NA	NA	NA	NA	0.4442	0.0008645	0.7201	0.02647	9.435e-05	0.6724	1.738e-05	-0.0178	0.9489
rs9724754	1	1	1	177351031	A	C	0.0846	0.2554	-0.4843	0.00114	0.001834	-0.0712	0.4635	0.3794	0.0009868	0.0179	0.1567	0.0114	0.7104	0.2991	0.0261	0.3488	0.0154	0.2751	0.0198	0.1121	-0.0091	0.7617	0.2269	0.0184	0.4919	0.021	0.1344
rs16849455	1	1	1	200179124	A	C	-0.1665	0.02019	0.3374	0.01881	0.002174	-0.0553	0.5515	-0.3843	0.0007339	0.0086	0.5675	-0.0699	0.06878	0.1818	-0.0415	0.2269	0.0211	0.209	0.0012	0.9363	-0.0424	0.2536	0.2675	-0.0429	0.182	0.0123	0.4601
rs1471915	1	1	1	228469247	A	G	0.1007	0.1271	-0.3864	0.004288	0.00228	-0.0534	0.5365	0.3503	0.0009704	0.0012	0.9188	0.0382	0.1667	0.3917	0.0272	0.2582	-0.0067	0.6082	0.0042	0.7131	0.021	0.4366	0.588	0.0213	0.3577	-0.0012	0.9255
rs10925401	1	1	1	235623753	T	C	-0.1036	0.01238	0.2644	0.003006	0.0004262	-0.0155	0.7672	-0.2779	0.0001075	-0.0076	0.3528	-0.0072	0.7188	0.6189	-0.0131	0.4576	-0.0059	0.5258	-0.0113	0.1608	0.006	0.7588	0.3756	-0.0133	0.4236	-0.0104	0.2567
rs2685294	1	1	1	235987070	A	G	-0.032	0.4746	0.3502	0.0002571	0.001429	0.0856	0.1168	-0.254	0.001361	-0.0006	0.9411	-0.0308	0.1073	0.2794	-0.0229	0.1613	0.0061	0.4981	-0.0016	0.8422	-0.0161	0.3897	0.6178	-0.0138	0.377	0.0027	0.7603
rs605792	1	1	1	239242378	A	G	0.0844	0.1381	0.4127	0.0004667	0.001287	0.2303	0.001771	-0.1825	0.0482	-0.0108	0.3187	-0.0416	0.09633	0.3701	-0.0291	0.1755	-0.0059	0.6333	-0.0074	0.4852	-0.0219	0.3714	0.7424	-0.0083	0.6862	-0.0091	0.4589
rs4669781	1	1	2	11860533	T	C	0.2079	0.01673	-0.4999	0.005587	5.964e-05	0.0091	0.9385	0.5753	1.233e-05	-0.0186	0.3785	0.0155	0.7509	0.6517	-0.015	0.7277	-0.0202	0.4053	-0.0058	0.7766	-0.0201	0.6702	0.9924	-0.0122	0.7634	-0.0001	0.9953
rs2716609	1	1	2	11877356	T	C	0.0184	0.7574	-0.4773	0.0003235	0.001056	-0.1503	0.02986	0.3666	0.001705	-0.0022	0.8646	-0.034	0.2637	0.3988	-0.0283	0.2849	0.0056	0.6993	-0.0012	0.9211	-0.0562	0.05786	0.1088	-0.044	0.07446	0.0111	0.4385
rs12713844	1	1	2	21091918	C	G	-0.2502	0.1988	1.1238	0.003837	0.0005551	0.1096	0.6983	-0.9193	0.0001733	-0.0346	0.496	-0.0649	0.6072	0.6545	-0.1006	0.338	-0.0146	0.7962	-0.0484	0.3251	0.0499	0.6771	0.4267	-0.0742	0.4501	-0.062	0.2595
rs4952222	1	1	2	31653367	A	C	0.182	0.04578	-0.331	0.07596	0.003328	0.03	0.8039	0.4945	0.0003422	0.0342	0.0332	0.0058	0.8724	0.09489	0.0479	0.1159	0.0293	0.1181	0.0388	0.01412	-0.0066	0.8516	0.03795	0.0468	0.1125	0.0382	0.03949
rs13429458	1	1	2	43492342	A	C	0.2427	0.0007337	0.1847	0.2214	0.001813	0.3045	0.0008153	0.1491	0.2257	0.0097	0.4604	0.0351	0.2118	0.3158	0.0349	0.1602	0.0006	0.9703	0.0173	0.1807	0.0402	0.1458	0.06371	0.054	0.02417	0.0028	0.8521
rs11686966	1	1	2	43901155	C	G	-0.3628	0.003767	-0.3441	0.2286	0.001847	-0.4834	0.0006007	-0.161	0.5163	-0.0196	0.5825	-0.1203	0.1709	0.3248	-0.1209	0.1184	0.0077	0.8432	-0.0457	0.1833	-0.14	0.09541	0.01023	-0.2065	0.002268	0.0037	0.9234
rs1444261	1	1	2	55207970	T	C	-0.2039	0.01795	0.334	0.05314	0.002766	-0.0824	0.4831	-0.4424	0.0003713	-0.0007	0.9709	-0.1287	0.003295	1.59e-18	-0.0039	0.9168	0.1727	5.381e-17	-0.0094	0.5966	-0.1003	0.01806	5.347e-16	-0.011	0.755	0.1556	1.916e-14
rs12104595	1	1	2	74621725	T	C	NA	NA	NA	NA	NA	-0.2712	0.7826	1.9654	0.0004913	NA	NA	NA	NA	NA	NA	NA	NA	NA	NA	NA	NA	NA	NA	NA	NA	NA	NA
rs759717	1	1	2	162566569	C	G	0.0304	0.5501	-0.3526	0.0008743	0.004183	-0.0942	0.1487	0.2508	0.002639	0.002	0.8209	0.0302	0.1632	0.4575	0.0234	0.2115	-0.0057	0.5826	0.0029	0.7437	0.0147	0.4886	0.7691	0.0142	0.4294	-0.0017	0.8676
rs2909450	1	1	2	162576037	A	G	0.0391	0.4473	-0.3646	0.0005469	0.002382	-0.0905	0.171	0.2606	0.001596	0.0022	0.812	0.031	0.1536	0.4457	0.0238	0.2043	-0.0056	0.5874	0.0033	0.7144	0.0147	0.4881	0.748	0.0151	0.4032	-0.0014	0.8917
rs11568364	1	1	2	169533229	T	C	0.0947	0.5811	1.4066	0.000288	0.0005988	0.5453	0.06424	-0.5736	0.004131	0.0205	0.4386	0.0574	0.2001	0.1064	0.0899	0.0339	-0.0185	0.5788	0.0224	0.3929	0.0753	0.09061	0.04933	0.1014	0.01584	-0.0337	0.3039
rs7563233	1	1	2	169550992	T	C	0.0755	0.6309	1.1758	0.0003572	0.0009079	0.5523	0.02773	-0.4962	0.0111	-0.0093	0.7106	0.0746	0.199	0.2117	0.057	0.215	-0.03	0.3092	-0.0072	0.7733	0.1081	0.0586	0.06189	0.0754	0.0963	-0.0407	0.1631
rs11892650	1	1	2	169589206	A	G	0.0108	0.9454	1.1361	0.0005819	0.000999	0.4687	0.06263	-0.5347	0.006077	0.0208	0.3678	0.043	0.3289	0.1499	0.0768	0.04887	-0.0056	0.841	0.0206	0.3672	0.0623	0.1535	0.07729	0.0878	0.02284	-0.0168	0.5474
rs4148770	1	1	2	169590330	A	G	0.0791	0.6206	1.0785	0.0005369	0.001236	0.5272	0.03118	-0.46	0.01939	-0.0042	0.8761	0.0241	0.6752	0.6243	0.0298	0.5239	-0.0157	0.6305	-0.0018	0.9454	0.0592	0.2946	0.2846	0.0492	0.285	-0.028	0.3851
rs1405649	1	1	2	178456515	A	G	0.195	0.006485	-0.2251	0.1237	0.001917	0.0969	0.2868	0.384	0.0007428	0.0101	0.4685	-0.0226	0.4632	0.5179	-0.0098	0.7175	0.0174	0.2795	0.0168	0.2179	-0.0315	0.2966	0.3026	-0.0011	0.9672	0.0247	0.12
rs4853647	1	1	2	192460381	A	G	0.1492	0.02507	-0.1944	0.1625	0.002677	0.0463	0.5743	0.3877	0.0005349	0.0117	0.3311	0.0139	0.6439	0.4629	0.0245	0.3311	0.0094	0.4913	0.0162	0.1732	0.0044	0.8802	0.272	0.0264	0.2728	0.0151	0.2659
rs11465886	1	1	3	10225783	A	G	-0.4023	0.004062	-0.0744	0.8237	0.005169	-0.5743	0.0002172	-0.2484	0.3613	0.0152	0.6351	-0.0904	0.1385	0.2566	-0.0588	0.2687	0.0362	0.3254	-0.0062	0.8438	-0.0901	0.1333	0.07395	-0.1032	0.04094	0.0311	0.3932
rs9310940	1	1	3	30697222	T	G	-0.1303	0.003308	-0.218	0.01728	0.0008431	-0.2086	0.0001639	0.0183	0.8079	0.0081	0.3295	-0.0073	0.7101	0.619	0.0027	0.8754	0.0086	0.361	0.0034	0.6795	-0.0166	0.3858	0.4656	-0.0162	0.3216	0.0088	0.3471
rs7374605	1	1	3	38582307	C	G	-0.1953	0.004879	-0.3397	0.01227	0.002111	-0.3049	0.000599	0.0213	0.8456	0.01	0.2147	0.0298	0.1259	0.1023	0.0349	0.04104	0.0021	0.8211	0.0072	0.3684	0.0222	0.2485	0.3505	0.0225	0.1808	0.0022	0.8099
rs12498069	1	1	3	38635940	A	C	0.1706	0.006743	-0.2772	0.03576	0.001746	0.0615	0.4562	0.3461	0.0006317	-0.003	0.8009	0.0023	0.9371	0.9545	-0.0054	0.8278	-0.0011	0.9351	0.0031	0.7907	-0.0111	0.6997	0.9032	0.0003	0.9892	0.0051	0.7007
rs7638353	1	1	3	153079090	A	C	0.1381	0.00155	-0.1346	0.1281	0.001568	0.0961	0.08605	0.2358	0.000806	-0.0075	0.3228	0.0343	0.05744	0.1637	0.0115	0.4592	-0.0139	0.1117	-0.0032	0.6721	0.0275	0.1201	0.1845	0.0176	0.2379	-0.01	0.2475
rs12488694	1	1	3	172227055	T	C	0.1743	0.2472	-0.9409	0.001632	0.0005466	-0.0954	0.6378	0.7277	0.0007132	-0.0404	0.09742	-0.048	0.3442	0.08887	-0.0934	0.03185	-0.0163	0.5737	-0.0349	0.1469	-0.0735	0.1418	0.08919	-0.0936	0.02768	-0.0025	0.9309
rs2699905	1	1	3	180367031	T	C	-0.0472	0.3385	-0.4276	2.351e-05	0.0001412	-0.1966	0.002382	0.2159	0.00508	0.0055	0.5388	-0.0263	0.2157	0.2119	-0.0181	0.326	0.0134	0.1939	0.0038	0.6648	-0.0435	0.03659	0.0365	-0.0316	0.07337	0.0171	0.09475
rs7640662	1	1	3	180384695	C	G	0.0203	0.7339	0.5079	2.358e-05	0.0001177	0.2102	0.008563	-0.2829	0.00156	-0.0133	0.2402	0.0018	0.946	0.483	-0.0087	0.71	-0.0158	0.2223	-0.0121	0.2758	0.0258	0.3217	0.2352	0.0088	0.6924	-0.0214	0.09429
rs7664889	1	1	4	77306728	T	G	0.1582	0.07909	-0.4372	0.01583	0.002171	-0.015	0.9024	0.4543	0.0007051	0.0473	0.001918	0.1033	0.001319	0.06253	0.062	0.0353	0.0059	0.7379	0.0504	0.0007908	0.0867	0.006178	0.09089	0.0578	0.04357	0.0136	0.4367
rs1470192	1	1	4	77318923	A	G	-0.14	0.1174	0.4421	0.01556	0.002377	0.0237	0.8439	-0.4546	0.000692	-0.044	0.006621	-0.0902	0.01186	0.3963	-0.0312	0.3485	-0.0136	0.4594	-0.0472	0.003127	-0.0704	0.04531	0.5272	-0.0274	0.3938	-0.0218	0.2315
rs3853189	1	1	4	77328725	T	C	0.1324	0.1408	-0.4565	0.01288	0.002494	-0.0347	0.7745	0.4533	0.0007358	0.0449	0.005918	-0.0118	0.744	0.02126	0.0291	0.3855	0.0514	0.00555	0.0477	0.002929	-0.0283	0.4231	0.006319	0.0246	0.4464	0.0589	0.001326
rs1712373	1	1	4	82374333	T	C	0.1405	0.4131	-0.607	0.135	0.001504	0.0712	0.7395	0.9881	0.000334	0.0059	0.8815	0.0541	0.5565	0.9633	0.0228	0.7783	0.0086	0.8469	0.0131	0.7334	0.0207	0.8176	0.74	0.0293	0.6989	0.0353	0.4222
rs230547	1	1	4	103755307	T	C	0.1531	0.02203	-0.3073	0.01836	0.002693	0.0379	0.6647	0.3592	0.0004164	-0.0031	0.8301	-0.029	0.3865	0.6363	-0.0278	0.3655	0.0044	0.7871	0.0041	0.7755	-0.0463	0.1528	0.5521	-0.0204	0.4819	0.0136	0.4003
rs1519551	1	1	4	142789922	A	G	-0.1498	0.0003915	-0.14	0.1155	0.0006087	-0.2043	8.373e-05	-0.0558	0.4445	0.0001	0.9911	0.0072	0.6774	0.9276	0.0048	0.7498	-0.0012	0.8923	-0.0045	0.5365	0.0017	0.9182	0.7347	-0.0117	0.4156	-0.0019	0.8197
rs932209	1	1	4	142807897	A	G	-0.1405	0.001304	-0.1312	0.1467	0.002276	-0.1921	0.0002919	-0.066	0.3797	0.003	0.695	0.0063	0.7277	0.7848	0.0108	0.4878	0.0012	0.8932	-0.0013	0.858	0.0009	0.9619	0.9499	-0.0059	0.6951	0.0002	0.9779
rs13122930	1	1	4	142869863	T	C	0.1448	0.0008729	0.1225	0.1788	0.00146	0.1942	0.0002125	0.0685	0.3717	0.0017	0.8207	0.0019	0.9121	0.9715	-0.0016	0.915	0.0025	0.7761	0.006	0.4202	0.0061	0.7177	0.5481	0.0138	0.3407	0.0034	0.696
rs1434621	1	1	4	162869105	C	G	-0.0908	0.06467	-0.3212	0.001734	0.0008018	-0.2015	0.0008864	0.1304	0.126	0.0104	0.2492	-0.0091	0.6722	0.4545	0.004	0.8293	0.0124	0.232	0.0071	0.4256	-0.0224	0.2872	0.2616	-0.0136	0.4368	0.0141	0.1693
rs4647602	1	1	4	185806795	T	G	0.2511	0.0009633	-0.2136	0.1551	0.000379	0.1658	0.09772	0.4047	0.0004432	0.0283	0.09465	0.0275	0.4355	0.2285	0.027	0.4242	0.0274	0.1641	0.0391	0.01827	0.0148	0.6662	0.04565	0.0413	0.1954	0.0385	0.04717
rs5743303	1	1	4	187225847	A	T	-0.0914	0.08097	0.2758	0.01064	0.007314	0.0072	0.9148	-0.2815	0.0007962	-0.0113	0.2418	-0.0153	0.5005	0.3647	-0.0227	0.251	-0.0074	0.5082	-0.014	0.1409	-0.0029	0.897	0.2774	-0.0203	0.2845	-0.0122	0.269
rs1063560	1	1	5	55307842	C	G	0.3085	0.08677	-1.2978	0.0003795	4.335e-05	-0.1359	0.6067	1.0294	8.516e-06	-0.1067	0.005286	-0.0761	0.3828	0.0004735	-0.3765	3.467e-08	-0.0745	0.0807	-0.0888	0.01768	-0.1426	0.0926	0.001357	-0.3638	3.855e-08	-0.0388	0.3553
rs3761740	1	1	5	74667889	A	C	0.0329	0.6581	0.5962	0.0004449	0.003479	0.2074	0.01975	-0.3328	0.01972	-0.0191	0.1451	-0.0326	0.2766	0.2497	-0.034	0.1855	-0.0144	0.3464	-0.0176	0.1746	-0.0135	0.6477	0.4232	-0.0151	0.541	-0.018	0.2347
rs17244848	1	1	5	74679426	T	C	-0.0466	0.529	-0.5862	0.0003823	0.002679	-0.2199	0.01214	0.3153	0.02404	0.0195	0.1404	0.0324	0.2806	0.2483	0.0332	0.199	0.0151	0.3231	0.0174	0.1803	0.0124	0.6745	0.4327	0.0126	0.6125	0.0187	0.2181
rs5909	1	1	5	74691931	A	G	0.0461	0.5406	0.617	0.0003097	0.001974	0.2323	0.009205	-0.3334	0.02079	-0.014	0.276	-0.0163	0.5538	0.5387	-0.022	0.3645	-0.0113	0.4519	-0.0123	0.3317	-0.0002	0.9955	0.5556	-0.0041	0.8616	-0.0149	0.3209
rs17648288	1	1	5	74732394	C	G	-0.0633	0.4009	-0.6389	0.0002149	0.001004	-0.2571	0.003697	0.3315	0.02304	0.0194	0.1511	0.0367	0.236	0.2425	0.037	0.1698	0.0141	0.3652	0.0168	0.2065	0.0155	0.6113	0.4925	0.0116	0.6532	0.0177	0.2519
rs3813667	1	1	5	79366315	T	C	0.0226	0.6324	-0.343	0.0005545	0.003347	-0.088	0.1524	0.2444	0.001621	0.0044	0.6012	-0.0061	0.7572	0.8152	0.0041	0.8106	0.0054	0.5703	0.0049	0.5508	-0.0191	0.3252	0.5516	-0.0027	0.8699	0.0091	0.3383
rs9293799	1	1	5	79381305	T	G	0.0194	0.6807	-0.3401	0.0005097	0.003648	-0.0912	0.1357	0.242	0.001658	0.0037	0.6553	-0.0018	0.926	0.8669	0.0075	0.659	0.0041	0.6671	0.0041	0.6115	-0.0151	0.4341	0.648	0.0002	0.9886	0.0077	0.4134
rs404375	1	1	5	79384515	A	G	0.0677	0.1228	-0.3412	0.0001229	0.0001577	-0.0531	0.3321	0.3007	3.548e-05	0.0007	0.9266	0.0165	0.3548	0.4281	0.0185	0.227	-0.0035	0.6764	0.0025	0.7279	0.0026	0.8837	0.6806	0.0132	0.3706	0.0006	0.9464
rs256438	1	1	5	79402005	T	G	0.0035	0.9397	0.3505	0.0002305	0.001599	0.1238	0.03466	-0.2299	0.002449	-0.0097	0.2242	0.0048	0.8029	0.4617	-0.014	0.3973	-0.0095	0.298	-0.0093	0.238	0.0186	0.3259	0.3547	-0.0036	0.8213	-0.0127	0.1612
rs2069812	1	1	5	131907815	A	G	-0.1275	0.007076	-0.2111	0.02988	0.002764	-0.1991	0.0007349	0.0242	0.7598	0.0056	0.4952	0.0117	0.5501	0.6241	0.0185	0.2673	0.0013	0.8873	0.0017	0.8361	0.0029	0.8782	0.9762	0.002	0.8998	0.0017	0.857
rs3776089	1	1	5	139707444	A	G	0.3015	0.001699	-0.4899	0.01875	0.001108	0.1408	0.2121	0.6557	0.0004766	0.012	0.1525	0.0085	0.6678	0.2945	0.0239	0.1639	0.0095	0.3233	0.0143	0.0874	0.0039	0.8424	0.1956	0.0266	0.1161	0.0113	0.2388
rs1000113	1	1	5	150220269	T	C	0.176	0.01428	-0.3059	0.03615	0.002869	0.0632	0.5004	0.4011	0.0005578	-0.0136	0.3687	0.0019	0.9606	0.7144	-0.0262	0.4143	-0.0108	0.526	-0.0054	0.718	-0.0176	0.63	0.9694	-0.0164	0.5876	-0.0018	0.9143
rs4712542	1	1	6	20880797	T	C	0.2541	0.0004759	0.2256	0.1311	0.0008555	0.3288	0.0002953	0.1326	0.2761	0.006	0.6644	-0.0667	0.0299	0.1586	-0.0509	0.06061	0.0179	0.2536	0.0147	0.2774	-0.0547	0.069	0.4331	-0.0191	0.4623	0.0199	0.2023
rs12175489	1	1	6	31485566	A	G	0.2036	0.0005657	0.1026	0.4183	0.001192	0.2489	0.0006167	0.1165	0.2653	NA	NA	NA	NA	NA	NA	NA	NA	NA	0.2037	0.0005204	0.1037	0.4111	0.001097	0.2492	0.0005227	0.1139	0.272
rs2534674	1	1	6	31573082	T	C	-0.1832	0.0001445	-0.1157	0.2612	0.0003048	-0.2254	0.0001333	-0.1061	0.2169	-0.0048	0.5514	0.0244	0.1995	0.298	0.0162	0.345	-0.0122	0.1806	-0.0098	0.22	0.0197	0.2919	0.3641	-0.0031	0.8501	-0.0133	0.1435
rs9267490	1	1	6	31625304	C	G	0.3015	0.1079	0.4936	0.2828	0.007007	0.7867	0.0007976	0.3553	0.254	0.0146	0.6418	0.0183	0.7458	0.81	0.0267	0.5488	0.0044	0.9196	0.0226	0.4647	0.0256	0.6487	0.4134	0.0542	0.2148	0.0029	0.9461
rs3091258	1	1	6	31655439	A	G	0.5205	0.08652	1.8398	0.08661	0.001556	0.8161	0.0005625	0.4375	0.1417	-0.286	0.003079	0.0793	0.6763	0.0121	-0.2763	0.05267	-0.2998	0.01609	-0.2092	0.02285	0.1343	0.4725	0.03767	0.0238	0.8446	-0.3089	0.0125
rs2857096	1	1	6	33019026	C	G	0.1072	0.01997	-0.3282	0.0006771	0.0002474	-0.0084	0.8846	0.3127	5.617e-05	NA	NA	NA	NA	NA	NA	NA	NA	NA	0.1074	0.01896	-0.329	0.0006192	0.0002113	-0.0086	0.8815	0.3144	4.204e-05
rs209474	1	1	6	33032562	A	G	-0.1001	0.02333	0.2621	0.003759	0.0007917	-0.0093	0.8685	-0.2662	0.0002189	-0.0046	0.5446	0.0416	0.02237	0.09305	0.0208	0.1937	-0.0119	0.1636	-0.0073	0.3249	0.0502	0.004857	0.0509	0.0184	0.2297	-0.0155	0.06756
rs3176337	1	1	6	36756898	A	C	0.0352	0.4197	0.3004	0.0006826	0.002962	0.1301	0.01452	-0.1716	0.02127	-0.0013	0.8672	0.0408	0.02868	0.06637	0.0316	0.04983	-0.0115	0.1977	-0.0002	0.9814	0.0519	0.004401	0.009366	0.04	0.009431	-0.0139	0.1187
rs2295591	1	1	6	137208164	A	G	0.2997	0.07262	-0.1351	0.7239	0.007769	0.3163	0.1165	1.0182	0.0009527	0.6223	0.231	0.6154	0.6312	0.4678	0.5623	0.3543	0.4278	0.7103	0.3327	0.03487	-0.0839	0.8172	0.003557	0.3398	0.07265	0.9886	0.0006416
rs9765848	1	1	6	169391752	T	C	0.0109	0.8471	0.4181	0.00096	0.004621	0.1381	0.03791	-0.2652	0.01488	-0.0088	0.3942	0.0029	0.9083	0.6706	-0.0151	0.4963	-0.0094	0.4203	-0.0082	0.4217	0.0185	0.449	0.598	0.0006	0.9774	-0.0124	0.2863
rs17154865	1	1	7	107483525	T	C	0.4889	0.003596	-0.8685	0.006057	6.626e-07	0.2353	0.3054	1.0708	1.617e-06	0.0927	0.5012	0.0574	0.8336	0.7789	0.1496	0.4472	0.0313	0.8708	0.254	0.01669	-0.3447	0.09432	0.0004011	0.1855	0.2119	0.4892	0.0007873
rs28954107	1	1	7	127679256	A	G	NA	NA	NA	NA	NA	NA	NA	2.1934	0.0001202	NA	NA	NA	NA	NA	NA	NA	NA	NA	NA	NA	NA	NA	NA	NA	NA	NA	NA
rs8192819	1	1	7	139232925	T	C	NA	NA	NA	NA	NA	2.3519	3.482e-07	NA	NA	-0.3612	0.52	0.3767	0.7042	0.8812	-0.2723	0.7378	0.5534	0.3864	-0.3612	0.52	0.3767	0.7042	0.8812	-0.2723	0.7378	0.5534	0.3864
rs2734166	1	1	7	141845935	A	G	0.4909	0.002559	-0.6329	0.07561	0.0008401	0.2252	0.2976	0.7153	0.02317	NA	NA	NA	NA	NA	NA	NA	NA	NA	0.4938	0.002225	-0.6367	0.07243	0.000687	0.2269	0.2878	0.7155	0.023
rs4726099	1	1	7	151134635	T	C	0.1142	0.03046	-0.2673	0.01396	0.001694	0.0082	0.9074	0.2853	0.0005204	-0.0019	0.8572	-0.024	0.3418	0.6935	-0.0165	0.4627	0.0015	0.8961	0.0025	0.8052	-0.0364	0.1384	0.6337	-0.014	0.5122	0.0071	0.5363
rs13224758	1	1	7	151135392	A	G	0.154	0.006379	-0.2564	0.02823	0.0009322	0.0612	0.4004	0.3158	0.0006227	0.0066	0.5828	-0.0132	0.6761	0.8323	0.0017	0.9518	0.0083	0.5265	0.013	0.2649	-0.0298	0.3291	0.5073	0.01	0.7045	0.0145	0.2635
rs12703159	1	1	7	151135431	T	C	0.0925	0.08178	-0.2886	0.008342	0.002751	-0.0203	0.7722	0.2752	0.0009776	-0.0009	0.9326	-0.0263	0.3543	0.6697	-0.0169	0.4977	0.0031	0.7976	0.003	0.7797	-0.0427	0.1193	0.5123	-0.0171	0.4667	0.0089	0.4612
rs13277738	1	1	8	18285787	T	C	0.1527	0.008372	0.2869	0.02279	0.001247	0.2517	0.0003905	-0.052	0.6196	-0.0084	0.4277	-0.0225	0.3942	0.4912	-0.0272	0.23	-0.0042	0.725	-0.0031	0.7677	-0.0093	0.7193	0.901	-0.0007	0.9747	-0.0047	0.6867
rs7820484	1	1	8	56968031	T	G	-0.186	0.1365	0.6508	0.01236	0.003273	0.0679	0.6941	-0.5977	0.000777	0.0016	0.9438	-0.0318	0.5519	0.7471	-0.0326	0.4728	0.007	0.7909	-0.0046	0.8373	-0.0038	0.9425	0.814	-0.0262	0.5519	-0.0066	0.8019
rs12347779	1	1	9	22118709	C	G	-0.2596	0.001666	0.1579	0.3422	0.0006844	-0.2166	0.03926	-0.4052	0.002621	-0.1176	0.007837	-0.2104	0.06082	0.01194	-0.2637	0.00765	-0.0647	0.1689	-0.1498	0.0001194	-0.0934	0.3146	0.0001955	-0.2414	0.0007482	-0.1035	0.01966
rs10980637	1	1	9	112732339	T	C	0.1652	0.01995	0.3335	0.02906	0.002885	0.2749	0.0009061	-0.0453	0.7283	-0.0132	0.3178	-0.0379	0.1945	0.2214	-0.0449	0.115	-0.0038	0.7963	-0.0072	0.579	-0.0247	0.3898	0.8048	-0.0105	0.6963	-0.0044	0.764
rs3780691	1	1	9	130910549	T	C	-0.6439	0.01612	0.7954	0.1098	0.007256	-0.4068	0.2091	-1.2091	0.0002843	NA	NA	NA	NA	NA	NA	NA	NA	NA	-0.6439	0.01416	0.7954	0.1046	0.005967	-0.4068	0.1995	-1.2064	0.002697
rs648072	1	1	10	6501550	T	C	0.4099	0.02017	-0.7906	0.02331	0.001054	0.0137	0.9595	0.7831	0.0002277	-0.0751	0.01794	-0.0301	0.6685	0.04272	-0.09	0.1119	-0.0739	0.04735	-0.0599	0.05514	-0.0597	0.3854	0.1359	-0.0855	0.1224	-0.0501	0.1729
rs658344	1	1	10	6527597	A	T	-0.523	0.005373	0.8588	0.02	0.0002431	-0.1054	0.7092	-0.9354	8.02e-05	0.0644	0.04054	0.0416	0.5513	0.02598	0.1242	0.02782	0.0646	0.07817	0.0484	0.1188	0.0698	0.3087	0.08035	0.1153	0.03735	0.0413	0.2551
rs4623785	1	1	10	12784342	C	G	0.155	0.1284	-0.5871	0.003904	0.002064	-0.074	0.5915	0.5521	0.0002598	0.0213	0.3931	0.0654	0.2074	0.3347	0.0645	0.1992	0.0098	0.7266	0.029	0.2306	0.025	0.6188	0.3048	0.0478	0.31	0.0286	0.3002
rs12247963	1	1	10	15875255	A	G	-0.1496	0.1328	0.6186	0.002562	0.0008278	0.0872	0.5106	-0.5903	0.0001599	0	0.9998	-0.1028	0.03915	0.07619	-0.0898	0.03756	0.0259	0.2806	-0.0066	0.7501	-0.0623	0.1979	0.1964	-0.0726	0.07665	0.0114	0.6304
rs12414709	1	1	10	17081089	A	G	0.1711	0.005197	0.2246	0.08114	0.003095	0.2508	0.0006494	0.0364	0.7416	-0.0014	0.8994	0.0093	0.7326	0.9361	0.0034	0.8877	-0.0044	0.7274	0.0043	0.6986	0.0185	0.4849	0.4232	0.0278	0.2229	-0.0039	0.7584
rs12256677	1	1	10	83864767	A	G	-1.6012	0.001087	-1.2351	0.2657	0.002803	-1.9839	0.0007165	-0.7999	0.3894	-0.0056	0.8866	0.002	0.9697	0.9891	-0.0054	0.9218	-0.0077	0.889	-0.0156	0.6885	-0.0008	0.9881	0.9238	-0.0225	0.6798	-0.0106	0.848
rs1426620	1	1	10	90150578	T	C	-0.0119	0.8258	-0.3592	0.0008266	0.002117	-0.1529	0.0297	0.227	0.00588	0.0038	0.681	0.0223	0.3083	0.6314	0.014	0.4672	0.0006	0.953	0.0034	0.7131	0.007	0.745	0.9197	0.0021	0.9102	0.0045	0.6732
rs1409134	1	1	10	90255444	T	C	-0.0142	0.7802	-0.3652	0.0003289	0.001131	-0.1541	0.01866	0.2274	0.00425	-0.0008	0.9294	-0.0038	0.8616	0.9054	-0.0116	0.5453	0.0024	0.8119	-0.0012	0.8915	-0.0198	0.3523	0.4968	-0.0232	0.2091	0.0061	0.5457
rs12358054	1	1	10	90973268	T	C	0.2235	0.002272	0.2844	0.07189	0.00373	0.3227	0.0007451	0.0302	0.8017	0.0019	0.8793	0.0169	0.5583	0.8791	0.0084	0.7504	0.0002	0.9904	0.0081	0.5067	0.0257	0.3659	0.4069	0.0312	0.221	0.0005	0.9706
rs17885986	1	1	10	101951161	A	G	0.1849	0.01668	-0.3662	0.01865	0.001767	0.0542	0.5943	0.4366	0.0003036	-0.0018	0.9002	0.03	0.3646	0.6409	0.0282	0.3232	-0.0099	0.5596	0.0047	0.7436	0.0127	0.6937	0.6413	0.0301	0.2724	-0.0011	0.9466
rs11196174	1	1	10	114724086	A	G	-0.2072	5.321e-06	0.0083	0.93	3.205e-05	-0.2112	0.0001516	-0.2067	0.008809	-0.0399	4.512e-05	0.0124	0.5947	0.000158	-0.0463	0.02479	-0.04	0.0003112	-0.0474	7.136e-07	0.0121	0.5928	1.915e-06	-0.0666	0.0005586	-0.0432	8.09e-05
rs4074720	1	1	10	114738487	T	C	0.1849	2.766e-05	-0.0407	0.6523	0.0001471	0.1888	0.0004139	0.2025	0.008054	0.0386	8.829e-07	0.0069	0.7117	8.022e-07	0.0683	2.29e-05	0.0306	0.0006722	0.0432	2.292e-08	0.0049	0.7867	8.174e-09	0.0787	3.381e-07	0.033	0.0002195
rs7901695	1	1	10	114744078	T	C	-0.3452	9.29e-05	0.0198	0.8989	0.0004655	-0.3466	0.0007324	-0.3949	0.007523	-0.0386	4.397e-06	-0.02	0.3264	1.624e-05	-0.0596	0.0006634	-0.0321	0.0007917	-0.0415	7.233e-07	-0.0193	0.3391	1.891e-06	-0.068	7.959e-05	-0.0338	0.0004102
rs4132670	1	1	10	114757761	A	G	0.2304	4.041e-07	0.0069	0.9395	2.746e-06	0.2405	1.46e-05	0.2233	0.003468	0.0498	2.566e-09	0.0252	0.2067	1.525e-09	0.0858	5.892e-07	0.0389	4.756e-05	0.0558	1.131e-11	0.0243	0.2114	1.447e-12	0.0998	1.178e-09	0.0418	1.038e-05
rs6585202	1	1	10	114772793	T	C	-0.1922	1.615e-05	0.0192	0.8306	0.000101	-0.2061	0.0001265	-0.1859	0.01375	-0.0297	0.0001003	-0.0018	0.9208	0.000358	-0.0427	0.005366	-0.0265	0.00262	-0.0344	4.767e-06	-0.001	0.9566	1.069e-05	-0.0553	0.0001721	-0.0287	0.001028
rs7924080	1	1	10	114777002	T	C	-0.1888	2.147e-05	0.0232	0.7948	0.0002092	-0.2006	0.0001914	-0.1762	0.01811	-0.0238	0.001921	-0.0092	0.6049	0.00577	-0.0338	0.02901	-0.0215	0.01523	-0.0287	0.000148	-0.008	0.6488	0.0003096	-0.047	0.001581	-0.0237	0.007004
rs12243326	1	1	10	114778805	T	C	-0.254	3.727e-08	-0.0124	0.8938	2.296e-07	-0.271	1.505e-06	-0.2211	0.004897	-0.0462	1.225e-07	-0.022	0.2874	1.108e-07	-0.0796	1.013e-05	-0.0352	0.00042	-0.0535	4.463e-10	-0.0216	0.2862	6.616e-11	-0.0978	1.167e-08	-0.0383	0.0001113
rs11196213	1	1	10	114811544	T	C	0.1555	0.000316	0.0733	0.4253	0.0007321	0.1911	0.0003249	0.1014	0.1856	0.0288	0.0003261	-0.0074	0.6986	0.001533	0.0364	0.0259	0.0264	0.003988	0.0331	2.654e-05	-0.004	0.8307	7.928e-05	0.0502	0.001312	0.0275	0.00254
rs4918789	1	1	10	114811797	T	G	-0.1508	0.0004637	-0.0863	0.3467	0.0008181	-0.1923	0.0002777	-0.0861	0.2616	-0.0279	0.0004455	0.0066	0.7257	0.002129	-0.0354	0.02875	-0.0255	0.005073	-0.032	4.158e-05	0.0028	0.8802	0.0001238	-0.0492	0.001463	-0.0264	0.003541
rs7087006	1	1	10	114813416	A	G	-0.1462	0.0007328	-0.0793	0.3866	0.001377	-0.1847	0.0004848	-0.088	0.2525	-0.0253	0.001543	0.0113	0.5504	0.00728	-0.0263	0.1043	-0.0248	0.006823	-0.0294	0.0001864	0.0075	0.6853	0.0007915	-0.0403	0.009261	-0.0257	0.004752
rs7076938	1	1	10	115779365	T	C	-0.0303	0.5016	0.3169	0.0007896	0.003	0.0658	0.265	-0.2438	0.000871	0.0116	0.1859	0.0114	0.599	0.3913	0.0154	0.4083	0.0089	0.3725	0.0101	0.243	0.0268	0.204	0.3758	0.0201	0.2571	0.0042	0.6714
rs1801253	1	1	10	115795046	C	G	-0.0299	0.5107	0.3135	0.0009784	0.003529	0.0679	0.2536	-0.2407	0.001108	0.0108	0.2123	0.0163	0.4291	0.3915	0.0155	0.383	0.0078	0.4313	0.0094	0.2716	0.0297	0.1393	0.3372	0.0199	0.2413	0.0033	0.7378
rs3813720	1	1	10	115797006	T	C	-0.0722	0.09759	0.2545	0.005132	0.004671	0.0215	0.6941	-0.2505	0.0006676	0.0054	0.5115	0.0312	0.1274	0.2531	0.0275	0.1199	-0.0013	0.889	0.0027	0.7359	0.0421	0.03507	0.2126	0.0269	0.1086	-0.0052	0.5696
rs163182	1	1	11	2800792	C	G	0.1037	0.01316	0.2359	0.007379	0.00238	0.1798	0.0006939	-0.0279	0.6929	0.0197	0.01543	0.0185	0.356	0.03382	0.034	0.05596	0.0152	0.0981	0.0228	0.004279	0.0292	0.1339	0.003319	0.0491	0.003571	0.0144	0.1123
rs11023894	1	1	11	16241192	A	T	0.0262	0.5446	0.3346	0.0003424	0.003731	0.1315	0.01484	-0.1792	0.0161	-0.0064	0.4076	0.0172	0.3453	0.4548	0.0037	0.818	-0.0095	0.2822	-0.0053	0.4817	0.029	0.1052	0.1999	0.0142	0.3519	-0.0118	0.1753
rs7127347	1	1	11	17257420	T	G	-0.1468	0.01915	-0.3025	0.03055	0.003596	-0.2482	0.0008649	0.06	0.62	-0.0141	0.2401	0.0264	0.3583	0.3392	0.0073	0.7686	-0.0209	0.1257	-0.019	0.107	0.0129	0.6479	0.2748	-0.0192	0.4144	-0.0199	0.1425
rs5030490	1	1	11	36490761	T	C	-0.3315	0.04568	0.583	0.1202	0.004077	-0.0997	0.6533	-0.8426	0.0006113	-0.0241	0.4762	-0.0723	0.278	0.3762	-0.0727	0.2901	-0.0134	0.7264	-0.0364	0.2714	-0.0522	0.4262	0.3005	-0.0694	0.2916	-0.033	0.383
rs12363738	1	1	11	58085155	T	C	0.0979	0.2096	-0.422	0.006889	0.006011	-0.0586	0.5707	0.3915	0.0008449	0.0281	0.09785	-0.0452	0.2818	0.1394	0.006	0.868	0.0376	0.04809	0.0313	0.05949	-0.0706	0.08171	0.04763	-0.0012	0.9727	0.0467	0.01285
rs11603912	1	1	11	73044894	A	C	0.2211	0.03058	0.4341	0.0563	0.008483	0.4085	0.0004189	-0.0625	0.7453	-0.0163	0.3374	-0.0458	0.2021	0.4601	-0.0457	0.1519	-0.0042	0.8323	-0.0098	0.5604	-0.034	0.338	0.8948	-0.0179	0.5606	-0.0048	0.8076
rs7110389	1	1	11	103339015	T	C	0.3693	0.07646	-0.5732	0.1243	0.01847	0.158	0.596	0.7904	0.0009864	0.0014	0.9489	0.0008	0.9878	9.011e-09	-0.2873	1.022e-09	-0.0104	0.6694	0.0055	0.7987	-0.0113	0.8324	1.917e-08	-0.2761	2.819e-09	-0.0043	0.8598
rs260815	1	1	11	103423950	T	C	-0.0153	0.7392	-0.343	0.0003101	0.0006868	-0.1317	0.02561	0.2199	0.002931	-0.0073	0.3632	-0.0072	0.7027	0.64	-0.0119	0.4784	-0.0069	0.4546	-0.0075	0.3417	-0.0201	0.2774	0.4944	-0.021	0.1916	-0.0033	0.7206
rs8177342	1	1	11	125656458	C	G	-0.3059	0.02651	0.5929	0.0423	0.001756	-0.0524	0.8108	-0.6055	0.0009442	0.0082	0.6849	0.1212	0.01706	2.977e-10	0.318	5.588e-12	0.0061	0.7845	0.0014	0.9451	0.1354	0.006815	1.286e-09	0.3017	2.301e-11	-0.0033	0.8797
rs9788217	1	1	12	5020463	T	C	-0.0532	0.2102	-0.309	0.0004217	0.0006666	-0.1662	0.001865	0.1586	0.02417	0.0017	0.8228	-0.0072	0.6872	0.9065	0.0002	0.9875	0.003	0.7309	0	0.9954	-0.0192	0.271	0.4623	-0.0126	0.3896	0.0053	0.5377
rs11048506	1	1	12	26463779	C	G	-0.061	0.149	0.2598	0.003891	0.00401	0.0284	0.5919	-0.2464	0.0006848	-0.0076	0.3104	-0.0189	0.2935	0.2577	-0.0241	0.1167	-0.0019	0.8294	-0.0093	0.209	-0.008	0.6479	0.3031	-0.0199	0.1765	-0.0053	0.5322
rs9788087	1	1	12	26486725	T	C	NA	NA	NA	NA	NA	NA	NA	-2.0373	0.0009976	NA	NA	NA	NA	NA	NA	NA	NA	NA	NA	NA	NA	NA	NA	NA	NA	NA	NA
rs35319643	1	1	12	55843092	A	G	NA	NA	NA	NA	NA	0.8479	0.000594	NA	NA	NA	NA	NA	NA	NA	NA	NA	NA	NA	NA	NA	NA	NA	NA	NA	NA	NA	NA
rs17815047	1	1	12	70207173	T	C	-0.0452	0.3434	0.3213	0.0009883	0.003337	0.0706	0.2248	-0.2406	0.003	-0.0096	0.257	-0.046	0.02463	0.02337	-0.0494	0.005755	0.0018	0.8483	-0.0107	0.1984	-0.0302	0.1316	0.08479	-0.0387	0.02324	-0.0017	0.8606
rs10431392	1	1	12	113588026	A	G	-0.2039	0.005257	-0.2345	0.1511	0.003138	-0.2939	0.0009115	-0.0557	0.6839	-0.0046	0.8314	0.0327	0.5272	0.8332	0.0105	0.8115	-0.0111	0.6494	-0.0204	0.3209	0.0083	0.8669	0.4699	-0.0501	0.201	-0.0125	0.6032
rs838878	1	1	12	123826598	A	G	-0.1333	0.005414	-0.2115	0.03784	0.002738	-0.202	0.0009423	0.0187	0.8188	0.0042	0.6105	-0.0063	0.754	0.9028	0.0045	0.7965	0.0037	0.692	0.0002	0.9805	-0.0142	0.4742	0.7096	-0.0114	0.4944	0.0039	0.6751
rs9634312	1	1	12	130898060	A	G	0.0832	0.05032	-0.29	0.0008777	0.0005057	-0.0237	0.6526	0.2805	7.359e-05	0.016	0.03068	0.0055	0.7538	0.07561	0.0233	0.1234	0.0142	0.09433	0.018	0.01363	-0.006	0.7243	0.04569	0.0196	0.1774	0.0181	0.03212
rs1805055	1	1	13	46367969	T	G	0.3536	0.002224	-0.1783	0.5159	0.0001593	0.2541	0.09086	0.7084	0.0002386	-0.028	0.3745	-0.1092	0.1684	0.3754	-0.0945	0.1586	-0.0106	0.7641	-0.0013	0.9656	-0.1146	0.1324	0.82	-0.0353	0.5634	0.0129	0.7091
rs986642	1	1	13	56944263	C	G	-0.1316	0.003275	-0.1529	0.1043	0.003975	-0.1845	0.0008876	-0.0408	0.5986	-0.0013	0.865	-0.0231	0.2142	0.3978	-0.0178	0.2713	0.0047	0.6059	-0.0053	0.4925	-0.0281	0.1237	0.09372	-0.0312	0.04456	0.0041	0.6523
rs538390	1	1	13	109653678	T	G	0.0464	0.3022	0.323	0.000693	0.00237	0.1497	0.007719	-0.1666	0.03038	0.0025	0.7522	-0.0129	0.4815	0.873	-0.0024	0.879	0.0046	0.6077	0.0038	0.6242	-0.0008	0.9624	0.832	0.009	0.5552	0.0023	0.7964
rs648705	1	1	13	109654154	A	C	-0.024	0.6035	-0.3248	0.0008025	0.00359	-0.1284	0.02503	0.1932	0.01417	-0.0042	0.5835	0.0092	0.6196	0.8558	-0.002	0.9009	-0.0053	0.5486	-0.0048	0.5296	-0.0027	0.8835	0.6887	-0.0112	0.4643	-0.0028	0.7485
rs645098	1	1	13	109654272	T	C	0.0499	0.2687	0.3351	0.0004097	0.001214	0.1577	0.004834	-0.1746	0.02326	0.0025	0.7477	-0.0126	0.4907	0.8774	-0.002	0.8974	0.0044	0.6185	0.0039	0.6112	0	0.9981	0.804	0.01	0.5092	0.0021	0.8166
rs598893	1	1	13	109657744	T	C	0.0329	0.4609	0.3268	0.0004669	0.001861	0.1413	0.01088	-0.1836	0.01521	0.0025	0.7416	-0.013	0.4701	0.8733	-0.0025	0.8714	0.0045	0.6092	0.0034	0.6506	-0.0008	0.9651	0.8471	0.0083	0.5821	0.002	0.8221
rs4773147	1	1	13	109761088	T	C	0.1063	0.01386	0.2146	0.01569	0.002413	0.1784	0.0009043	-0.0359	0.62	-0.1775	0.3119	0.3108	0.3826	0.3958	-0.0336	0.8842	-0.3786	0.1865	0.0894	0.03199	0.2194	0.01049	0.003031	0.1673	0.001235	-0.0571	0.4111
rs3093263	1	1	13	112806451	C	G	NA	NA	NA	NA	NA	-0.7968	0.0006653	NA	NA	NA	NA	NA	NA	NA	NA	NA	NA	NA	NA	NA	NA	NA	NA	NA	NA	NA	NA
rs12887630	1	1	14	37743255	T	C	-0.0047	0.9202	0.4189	3.073e-05	0.0002546	0.1253	0.02654	-0.2861	0.0006905	0.0034	0.6874	-0.0197	0.3323	0.5885	-0.0079	0.657	0.0074	0.4458	0.0031	0.709	-0.0023	0.9069	0.9181	0.0042	0.8021	0.0035	0.7183
rs17103109	1	1	14	74820374	T	G	-0.1344	0.03879	0.3309	0.01394	0.001418	-0.019	0.8204	-0.374	0.0002723	-0.0019	0.8868	-0.0501	0.1099	0.1539	-0.0562	0.04028	0.0118	0.4224	-0.007	0.5831	-0.0302	0.3221	0.2026	-0.0525	0.04377	0.0038	0.7949
rs1005367	1	1	14	74821835	A	G	-0.1189	0.004055	0.1472	0.08623	0.003081	-0.0695	0.1806	-0.2338	0.000632	-0.0063	0.444	-0.0241	0.2384	0.4387	-0.0237	0.1821	-0.0017	0.8543	-0.0108	0.1849	-0.0148	0.457	0.2188	-0.0287	0.08756	-0.0061	0.511
rs3742768	1	1	14	74828813	T	C	-0.1254	0.002615	0.1431	0.09345	0.002069	-0.0773	0.1404	-0.237	0.000478	-0.0094	0.2307	-0.02	0.2862	0.2402	-0.0282	0.08423	-0.0041	0.6516	-0.0135	0.08049	-0.0124	0.4979	0.09402	-0.0327	0.03573	-0.0082	0.3587
rs2288493	1	1	14	80681359	T	C	-0.1365	0.01501	0.3203	0.007526	0.001835	-0.0217	0.7477	-0.3494	0.0005372	0.0106	0.2828	-0.0258	0.2526	0.3204	-0.009	0.6454	0.0169	0.1393	0.0062	0.5258	-0.0138	0.5332	0.5239	-0.0099	0.5977	0.0122	0.2845
rs929608	1	1	14	91406528	T	C	0.0323	0.4429	-0.3033	0.0005675	0.002201	-0.0686	0.1978	0.2154	0.002256	-0.0091	0.2421	-0.0419	0.02538	0.01485	-0.0488	0.002492	0.0024	0.7872	-0.0077	0.314	-0.0533	0.003633	0.005795	-0.0504	0.001079	0.0057	0.5138
rs12438818	1	1	15	46383458	A	T	0.1477	0.3919	-0.4468	0.1561	0.001632	0.0369	0.8645	0.6142	0.0003732	0.0147	0.6197	-0.0725	0.2774	0.3721	-0.0482	0.3795	0.0349	0.3086	0.0187	0.5199	-0.0889	0.1729	0.131	-0.0501	0.3476	0.0585	0.08169
rs4255736	1	1	15	46515583	A	C	NA	NA	NA	NA	NA	-2.0701	2.569e-05	NA	NA	-0.0368	0.5704	0.1125	0.504	0.6986	0.0524	0.7231	-0.0524	0.4607	-0.0368	0.5704	0.1125	0.504	0.6986	0.0524	0.7231	-0.0524	0.4607
rs6598554	1	1	15	97172789	T	C	-0.0476	0.2736	-0.3019	0.0009873	0.003235	-0.1484	0.007295	0.1457	0.0468	0.0022	0.7833	0.0229	0.2254	0.5935	0.0167	0.3051	-0.0025	0.7855	0.0006	0.941	0.0096	0.6055	0.9839	0.0033	0.8312	-0.0001	0.9879
rs12441731	1	1	15	99738323	C	G	0.2111	0.0002162	0.0662	0.5648	0.0009861	0.2443	0.0005492	0.1516	0.1091	-0.0014	0.9009	0.0066	0.8166	0.9455	0.0051	0.8403	-0.0034	0.7843	0.0066	0.5498	0.0101	0.7164	0.3948	0.0331	0.1665	-0.0007	0.955
rs8062278	1	1	16	15946930	C	G	-0.1471	0.002139	-0.1974	0.06044	0.001602	-0.212	0.0003671	-0.035	0.6881	0.0015	0.8613	-0.0175	0.409	0.5383	-0.0159	0.3789	0.007	0.4714	-0.0032	0.7074	-0.0247	0.2358	0.138	-0.0328	0.05781	0.0065	0.5014
rs7187018	1	1	16	17107926	A	G	-1.0226	0.06837	1.5309	0.1766	0.0112	0.5058	0.3013	-2.0486	0.0007895	-0.8657	0.1813	1.3472	0.3167	0.1613	-0.1497	0.8911	-1.5399	0.06212	-0.9553	0.02427	1.4546	0.09323	0.001891	-0.1477	0.8418	-1.8713	0.0001228
rs992381	1	1	16	20603065	A	C	-0.1801	0.7	-0.9963	0.2726	0.5171	-0.4542	0.4	2.0296	0.0003275	0.0358	0.6517	0.0287	0.8551	0.8838	0.0561	0.6354	0.011	0.918	0.0295	0.7055	-0.002	0.9899	0.9469	0.0317	0.7836	0.011	0.918
rs1064825	1	1	16	68281721	A	G	0.0161	0.8574	-0.6082	0.0008178	0.002201	-0.1976	0.1104	0.3929	0.003084	0.0327	0.0853	0.0712	0.1569	0.08992	0.0873	0.05496	0.0156	0.4452	0.032	0.08571	0.0226	0.6414	0.186	0.0525	0.2178	0.0244	0.2277
rs4280248	1	1	16	84619550	T	C	-0.2085	5.302e-05	0.1378	0.1997	0.0001173	-0.1578	0.0145	-0.3028	0.0006112	-0.0145	0.1431	-0.0505	0.02846	0.01978	-0.0557	0.005431	-0.0022	0.8484	-0.0214	0.02731	-0.0422	0.06112	0.002433	-0.0649	0.0006803	-0.007	0.5298
rs8075977	1	1	17	1607551	T	C	-0.0837	0.0547	0.2909	0.001353	0.0008673	0.0106	0.842	-0.2766	0.0002489	-0.0047	0.5743	0.0231	0.2615	0.4005	0.0152	0.4104	-0.0101	0.2876	-0.0076	0.3565	0.0363	0.07083	0.2139	0.0146	0.4018	-0.0143	0.1296
rs734465	1	1	17	12528539	A	G	-0.18	0.0004317	-0.1375	0.2028	0.0006586	-0.2335	0.0002441	-0.0821	0.3557	0.0014	0.867	-0.0139	0.4822	0.9095	0	0.9983	0.0025	0.7849	-0.0032	0.6916	-0.018	0.3547	0.4772	-0.0155	0.337	0.0016	0.8612
rs9897362	1	1	17	17397471	A	G	0.2145	0.01428	-0.3452	0.05077	0.001351	0.0593	0.6106	0.4678	0.0004591	-0.0156	0.3282	-0.0011	0.9755	0.6049	-0.0121	0.7222	-0.0172	0.3425	-0.0082	0.6036	-0.0154	0.6691	0.8858	-0.0063	0.8454	-0.0084	0.6404
rs7214988	1	1	17	17432561	C	G	-0.2004	0.02201	0.3288	0.06276	0.002572	-0.0489	0.6746	-0.4451	0.0008731	0.0122	0.4171	-0.0199	0.5305	0.4776	-0.0045	0.8786	0.0186	0.2855	0.0061	0.6816	-0.009	0.7731	0.6926	-0.0072	0.7997	0.0108	0.5313
rs9895446	1	1	17	64981473	T	C	-0.242	0.001453	-0.2704	0.1021	0.001267	-0.3375	0.0002389	-0.071	0.6047	0.0067	0.6485	-0.019	0.6136	0.8294	-0.007	0.8261	0.0102	0.5347	-0.0024	0.8692	-0.0315	0.391	0.3366	-0.0436	0.1489	0.009	0.5795
rs1805084	1	1	18	19366204	T	C	0.2747	0.008043	0.4997	0.03528	0.0005766	0.4584	0.0002135	-0.0033	0.9867	0.0215	0.382	0.0393	0.5208	0.4922	0.0549	0.2989	0.0138	0.6151	0.0351	0.141	0.068	0.251	0.03464	0.1183	0.01474	0.0137	0.6149
rs3745023	1	1	18	19378799	A	C	-0.2871	0.005707	-0.5049	0.03357	0.0003866	-0.4759	0.0001261	-0.0101	0.9594	-0.0094	0.6285	-0.0158	0.7044	0.8829	-0.0097	0.7811	-0.0089	0.701	-0.019	0.3208	-0.0303	0.4591	0.3436	-0.0443	0.1854	-0.0091	0.6938
rs17259313	1	1	18	19406905	C	G	0.279	0.007211	0.5305	0.02755	0.0003729	0.4722	0.0001214	-0.0127	0.9501	0.0224	0.3216	0.0316	0.5631	0.4958	0.041	0.3604	0.0179	0.491	0.0343	0.1211	0.0561	0.2926	0.0539	0.0928	0.02743	0.0176	0.4954
rs2229616	1	1	18	56190256	T	C	0.1815	0.2568	-0.8446	0.007542	0.001949	-0.0742	0.7252	0.8118	0.0007214	0.0076	0.7549	-0.0232	0.6763	0.8424	-0.0027	0.9525	0.0136	0.6337	0.0115	0.6339	-0.0479	0.3823	0.605	-0.0061	0.8911	0.0246	0.385
rs9962656	1	1	18	58998242	A	C	-0.0416	0.4206	-0.369	0.00044	0.002164	-0.178	0.007357	0.2029	0.01512	0.0006	0.9471	-0.0383	0.05366	0.0748	-0.0333	0.0497	0.0112	0.2513	-0.0006	0.9464	-0.0498	0.01066	0.01387	-0.0424	0.009907	0.0137	0.1546
rs2062010	1	1	18	59024062	T	C	-0.0092	0.8578	-0.353	0.0009885	0.005411	-0.1376	0.03556	0.2236	0.008911	0.0031	0.7349	-0.0435	0.04495	0.04705	-0.0381	0.04485	0.0147	0.1573	0.0027	0.7626	-0.0558	0.008682	0.01006	-0.046	0.01167	0.0177	0.08459
rs2062011	1	1	18	59027094	A	T	0.0316	0.5275	-0.3785	0.0002053	0.0008597	-0.1109	0.08269	0.2804	0.0004784	0.0019	0.8372	-0.0523	0.01665	0.02331	-0.043	0.02488	0.0147	0.1559	0.0028	0.7517	-0.0667	0.001778	0.004332	-0.0487	0.007922	0.0191	0.06254
rs9955190	1	1	18	59029863	A	G	-0.0185	0.7103	0.3371	0.000904	0.004798	0.1065	0.09099	-0.239	0.003152	-0.0014	0.8753	0.0456	0.03395	0.0553	0.0378	0.04395	-0.0127	0.2094	-0.0019	0.8262	0.0583	0.005634	0.01413	0.0435	0.01543	-0.0162	0.1057
rs17216663	1	1	19	807130	T	C	0.3875	0.1853	-0.2947	0.6338	0.3518	1.0401	0.0004945	0.7019	0.1314	NA	NA	NA	NA	NA	NA	NA	NA	NA	0.3875	0.1769	-0.2947	0.6287	0.3375	0.2834	0.4409	0.6668	0.2139
rs8101064	1	1	19	7244119	T	C	0.9708	0.00142	-1.0335	0.1045	0.0002935	0.4132	0.4294	1.3915	0.0003368	0.0195	0.4473	-0.0247	0.7137	0.7551	0.0254	0.6843	0.0174	0.5349	0.0262	0.3053	-0.0358	0.5925	0.5719	0.0309	0.6188	0.0247	0.3773
rs11083777	1	1	19	50849303	A	G	0.2118	0.0003351	0.0566	0.6432	0.0007051	0.2536	0.0003843	0.1772	0.08403	0.0038	0.7382	-0.0061	0.8108	0.9083	-0.0055	0.8076	0.0069	0.6057	0.0116	0.3038	-0.0035	0.8885	0.4853	0.0183	0.3906	0.0099	0.4546
rs6040068	1	1	20	10592984	T	C	0.2105	0.0001989	0.0851	0.4917	0.0002603	0.2488	0.0005015	0.1629	0.1015	-0.005	0.6777	-0.0284	0.3246	0.5827	-0.0267	0.2739	0.0019	0.8906	0.0044	0.7083	-0.0225	0.4231	0.8798	0.0027	0.9059	0.0049	0.7135
rs4911534	1	1	20	29910233	C	G	0.1195	0.02437	0.2647	0.01906	0.002551	0.219	0.0006927	-0.0464	0.6244	0.0101	0.3032	-0.0003	0.9901	0.4968	0.0021	0.918	0.0135	0.2273	0.0137	0.1542	0.0107	0.6382	0.2714	0.0216	0.2586	0.0126	0.2555
rs6130789	1	1	20	43316208	A	C	0.1148	0.07158	0.3894	0.005723	0.0007153	0.2587	0.0008422	-0.191	0.1037	0.0037	0.7882	0.0509	0.1233	0.3964	0.0419	0.1506	-0.0067	0.6676	0.0087	0.5195	0.0686	0.03277	0.04554	0.0691	0.01118	-0.0101	0.5166
rs7266413	1	1	20	43326264	A	G	0.3637	0.001011	-0.086	0.7062	0.0009353	0.3392	0.01837	0.4728	0.007417	-0.0166	0.4523	-0.066	0.2386	0.3521	-0.0532	0.3325	-0.0094	0.6949	-0.0018	0.9346	-0.0673	0.2158	0.847	-0.0022	0.9665	-0.0003	0.9911
rs4812042	1	1	20	56895310	A	G	-0.0633	0.1476	0.2438	0.005772	0.002931	0.0211	0.6972	-0.2394	0.000916	-0.0021	0.8169	-0.0037	0.86	0.9582	-0.0044	0.8043	-0.0022	0.8351	-0.0047	0.6004	0.0094	0.6424	0.7813	-0.0018	0.9136	-0.0073	0.4869
rs438031	1	1	21	26467875	T	C	0.0847	0.1872	-0.4699	0.0008938	0.00136	-0.0681	0.368	0.4235	0.0005475	0.0092	0.3785	0.03	0.196	0.3997	0.0304	0.1442	0.0033	0.7871	0.0112	0.2788	0.0167	0.4653	0.4639	0.0233	0.2465	0.0074	0.5368
rs999788	1	1	21	33559901	T	C	-0.033	0.5552	-0.3784	0.0007909	0.003001	-0.1632	0.02126	0.2109	0.01954	0.01	0.3844	-0.0075	0.7915	0.658	0.0035	0.888	0.012	0.3505	0.0082	0.4637	-0.0294	0.2814	0.3549	-0.0148	0.5229	0.0161	0.2079
rs4817658	1	1	21	34769084	A	G	0.2921	0.0185	-0.7533	0.002259	0.0007208	-0.0226	0.8921	0.6697	0.0003748	0.0113	0.1588	0.0475	0.01358	0.04358	0.0437	0.01198	0.0021	0.8187	0.0124	0.1193	0.0426	0.02633	0.04434	0.043	0.01298	0.0036	0.6889
rs34518056	1	2	1	1140150	A	G	0.6511	0.01965	0.4601	0.4041	0.02669	2.98	0.0001862	0.4115	0.3073	1.7114	0.003273	0.3416	0.8601	0.006822	1.5898	0.01171	2.6152	0.1914	0.8524	0.0006615	0.4521	0.3906	0.0004622	1.5898	0.01171	0.4956	0.2036
rs11803575	1	2	1	24054935	A	T	-0.2688	0.006249	0.4217	0.03195	0.001561	-0.0708	0.6245	-0.4944	0.0003272	-0.1911	0.07145	0.0207	0.9281	0.1404	-0.1824	0.2398	-0.1856	0.2327	-0.2325	0.001242	0.2536	0.08722	0.0006009	-0.1233	0.2436	-0.3609	0.0004176
rs11247611	1	2	1	27340571	T	C	0.1753	0.4723	-0.4438	0.3737	0.4051	-0.0848	0.8285	1.1447	1.614e-05	0.1178	0.6856	0.8074	0.1543	0.1661	0.74	0.04176	-0.4388	0.3163	0.1513	0.4179	0.0949	0.7987	0.4685	0.3576	0.1791	0.1606	0.5227
rs1886146	1	2	1	27342168	T	G	NA	NA	NA	NA	NA	-1.9584	5.361e-05	-1.7293	0.147	0.3055	0.3457	0.9342	0.2058	0.07568	1.4756	0.01577	0.1646	0.6528	0.3055	0.3457	0.9342	0.2058	0.07568	1.4756	0.01577	0.1646	0.6528
rs11247614	1	2	1	27351556	T	C	0.6697	0.003248	0.6538	0.2034	0.002736	1.0749	6.004e-06	0.2729	0.5242	0.6844	0.1767	-1.6057	0.1308	0.1239	-0.2519	0.7737	1.46	0.005474	0.6721	0.001202	0.2341	0.6093	0.002309	0.8379	0.00125	0.7392	0.02484
rs17107817	1	2	1	53306945	T	C	-0.4317	0.002986	0.3327	0.2842	0.002059	-0.3031	0.1472	-0.7006	0.000586	-0.0875	0.6013	0.7964	0.02368	0.04139	0.4454	0.1251	-0.4205	0.0419	-0.2847	0.009393	0.5322	0.02154	0.0006757	-0.0495	0.7703	-0.5647	8.93e-05
rs35285100	1	2	1	62841745	T	C	-0.1396	0.6905	0.9778	0.1761	0.3245	0.3789	0.4922	-1.2001	0.0005945	-0.9293	0.003105	-1.1977	0.1096	0.008836	-1.265	0.002838	-0.5649	0.3314	-0.5775	0.0136	-0.0582	0.9103	0.04674	-0.6542	0.05152	-0.5942	0.09593
rs10889869	1	2	1	70650552	A	G	0.5945	0.01705	1.8575	0.01447	4.473e-05	1.1409	6.142e-06	-0.7524	0.2965	NA	NA	NA	NA	NA	NA	NA	NA	NA	0.5945	0.01705	1.8575	0.01329	4.259e-05	1.204	8.96e-06	-0.7524	0.29
rs12723350	1	2	1	70660689	T	C	-0.3598	0.2002	1.1413	0.05192	0.003697	0.1882	0.6742	-1.4089	6.175e-05	1.2907	0.3025	-1.6449	0.4294	0.2213	0.8474	0.6056	2.5142	0.06709	-0.2863	0.2945	0.9344	0.09513	0.01646	0.2339	0.5879	-1.0113	0.004853
rs17413395	1	2	1	86227751	C	G	0.3437	0.01708	0.5196	0.07053	0.007493	0.6048	0.0004226	0.002	0.9934	-0.2963	0.1741	-0.0073	0.988	0.4603	-0.284	0.3612	-0.2816	0.3713	0.1502	0.2109	0.3863	0.116	0.06519	0.3595	0.02196	-0.101	0.5947
rs4537545	1	2	1	152685503	T	C	-0.013	0.8631	0.2628	0.0799	7.495e-07	0.0856	0.3991	-0.3767	6.911e-05	0.0855	0.3093	-0.0907	0.6087	0.3446	0.0429	0.7221	0.1188	0.3119	0.0312	0.5789	0.1163	0.307	0.002399	0.0682	0.3793	-0.1809	0.01367
rs7529229	1	2	1	152687402	T	C	-0.0054	0.9429	-0.3183	0.03515	4.38e-07	-0.1241	0.2241	0.4159	8.472e-06	-0.0767	0.3674	0.1556	0.3897	0.2588	-0.002	0.9867	-0.1377	0.2486	-0.0373	0.5102	-0.1253	0.2771	0.002757	-0.0745	0.3409	0.2048	0.005136
rs2808662	1	2	1	157825445	A	G	0.3875	0.004127	-0.6418	0.0182	0.0004928	0.1343	0.4753	0.7345	0.0001497	-0.1601	0.3977	-0.5009	0.2286	0.3306	-0.574	0.08178	0.0763	0.7421	0.2027	0.065	-0.602	0.007682	0.007396	-0.1008	0.5535	0.4683	0.001498
rs6701920	1	2	1	159181541	A	G	0.331	0.00335	0.5444	0.02078	0.0004445	0.5317	0.0002856	0.0463	0.8086	0.1306	0.3127	-0.3432	0.2452	0.09459	-0.1338	0.5406	0.2712	0.1058	0.2454	0.003847	0.203	0.2675	0.004529	0.3267	0.007181	0.1721	0.1694
rs17568826	1	2	1	166605366	A	G	0.3431	0.3059	-0.5676	0.4341	0.3772	0.9039	0.4156	1.4022	3.712e-06	0.3916	0.5425	-1.5182	0.1815	0.03215	-0.3172	0.7027	1.9421	0.002388	0.3534	0.2343	-0.8381	0.1668	0.03898	-0.3172	0.7027	0.9436	0.005047
rs7519632	1	2	1	171435116	T	C	NA	NA	NA	NA	NA	NA	NA	-3.4925	0.0002265	NA	NA	NA	NA	NA	NA	NA	NA	NA	NA	NA	NA	NA	NA	NA	NA	NA	NA
rs13374239	1	2	1	181811861	T	C	0.3799	0.02417	-0.5985	0.08129	0.005387	0.1681	0.5212	0.7005	0.0009385	0.3366	0.08667	-0.5637	0.2114	0.08664	0.1824	0.589	0.5004	0.03511	0.3625	0.004527	-0.5882	0.03028	0.000529	0.1787	0.387	0.6133	9.258e-05
rs689470	1	2	1	184907681	A	G	0.2672	0.0002457	0.269	0.06361	0.0001707	0.3695	0.0001576	0.106	0.3438	0.0747	0.3744	0.2709	0.1105	0.1038	0.3443	0.005408	-0.1039	0.3781	0.1846	0.0007914	0.2688	0.01418	5.426e-05	0.3602	2.624e-06	0.0081	0.9203
rs2821378	1	2	1	198289764	A	G	0.284	0.02563	0.6563	0.02323	0.0009266	0.5313	0.0003544	-0.1163	0.6395	-0.0019	0.9901	-0.4399	0.1838	0.5925	-0.1979	0.452	0.1612	0.4121	0.1711	0.08229	0.1848	0.3933	0.01746	0.356	0.005889	0.0525	0.7322
rs2737665	1	2	1	198329012	A	G	0.2918	0.0001402	0.2146	0.1618	0.0002125	0.3933	0.0001476	0.1658	0.1555	0.0772	0.3747	-0.0364	0.8367	0.5181	0.0896	0.4872	0.1294	0.2784	0.1986	0.0005453	0.108	0.3482	0.0005991	0.2735	0.0006998	0.148	0.07422
rs2816975	1	2	1	198347782	A	G	-0.0523	0.488	-0.531	0.0005593	0.001511	-0.307	0.002457	0.2781	0.0158	0.0734	0.4231	-0.1227	0.5148	0.5372	-0.0039	0.9779	0.0868	0.4716	-0.0008	0.9889	-0.3705	0.001754	0.002952	-0.2048	0.01307	0.1882	0.02287
rs2821337	1	2	1	198364366	A	G	0.3041	0.002019	-0.4207	0.03945	0.0002052	0.0518	0.7391	0.4919	0.0003138	-0.2164	0.1007	-0.1714	0.5758	0.3689	-0.2147	0.279	-0.0838	0.6282	0.1207	0.1251	-0.3446	0.04125	0.01646	-0.0497	0.6844	0.2747	0.009756
rs1144837	1	2	1	224899839	T	C	0.1824	0.04504	0.5143	0.006743	0.002044	0.3905	0.0008206	-0.1173	0.4286	-0.0215	0.8506	-0.286	0.2275	0.416	-0.1795	0.3539	0.0645	0.6481	0.1036	0.145	0.2059	0.162	0.05174	0.2394	0.01645	-0.0232	0.8195
rs2478544	1	2	1	228910819	C	G	0.0364	0.6202	0.3183	0.02975	9.84e-05	0.1331	0.1881	-0.2746	3.319e-05	-0.0239	0.7645	0.0699	0.6963	0.5746	0.0556	0.6814	-0.0601	0.5577	0.0098	0.8558	0.2187	0.05233	0.0001937	0.1065	0.1885	-0.2106	0.0001443
rs16835092	1	2	1	235511303	T	C	-0.8753	0.0003849	1.0302	0.0351	8.191e-06	-0.3785	0.2733	-1.4167	1.416e-05	0.2915	0.5838	1.9101	0.2286	0.3978	1.7349	0.2046	-0.0699	0.9228	-0.669	0.002782	1.1047	0.01677	9.809e-05	-0.2834	0.4261	-1.193	4.954e-05
rs10925439	1	2	1	235750125	T	C	0.2747	0.03197	0.6005	0.01994	0.007638	0.6364	0.0006091	-0.0488	0.7835	-0.0753	0.5281	-0.4886	0.05098	0.02333	-0.3421	0.0424	0.206	0.2418	0.0872	0.3172	0.0469	0.7929	0.7553	0.0847	0.5006	0.078	0.5298
rs4612666	1	2	1	245665693	T	C	-0.2047	0.004563	0.2331	0.1102	0.003528	-0.0902	0.3795	-0.343	0.0009425	-0.2256	0.004694	0.0874	0.6093	0.01539	-0.1278	0.332	-0.2818	0.007537	-0.2144	6.097e-05	0.1725	0.118	6.687e-05	-0.1042	0.1978	-0.3133	1.996e-05
rs3795974	1	2	2	11842401	T	C	0.2202	0.008753	-0.3792	0.02603	0.001092	0.0336	0.7952	0.3984	0.0003127	0.0278	0.7752	-0.2684	0.2078	0.6761	-0.0468	0.7462	0.081	0.5543	0.1384	0.02935	-0.337	0.01081	0.00396	-0.002	0.9838	0.2751	0.00127
rs2231345	1	2	2	68946792	T	G	0.321	0.02688	0.6211	0.04285	0.003888	0.6139	0.0007332	-0.0129	0.9581	0.2972	0.05313	-0.555	0.08972	0.02291	0.0023	0.9927	0.5027	0.0155	0.3101	0.003231	0.076	0.7327	0.003331	0.4074	0.005798	0.2848	0.07127
rs3917296	1	2	2	102151265	A	G	-0.8814	0.0004013	0.2115	0.6789	0.001906	-0.8132	0.0134	-1.1788	0.0002476	-0.0117	0.9759	-0.5953	0.3908	0.6863	-0.1059	0.842	0.1523	0.6612	-0.626	0.00278	-0.0676	0.8683	0.05201	-0.6176	0.02709	-0.3459	0.1827
rs951954	1	2	2	109816794	T	C	-0.1314	0.06442	0.0385	0.7752	5.809e-05	-0.1091	0.2903	-0.2934	0.000689	-0.0255	0.7695	0.0108	0.9518	0.8568	0.0025	0.9854	-0.088	0.4695	-0.0894	0.1041	0.0275	0.7974	0.0007311	-0.0694	0.3981	-0.2225	0.001498
rs4988285	1	2	2	136314036	A	T	0.1577	0.03963	-0.5003	0.001142	0.0003785	-0.0889	0.4113	0.3916	0.0004584	0.0411	0.6513	0.0586	0.7605	0.5608	0.1668	0.2485	-0.0612	0.6093	0.1104	0.05922	-0.2857	0.01666	0.03098	0.0028	0.9738	0.1841	0.02328
rs3821125	1	2	2	169757850	T	C	-0.0926	0.1913	-0.4731	0.0008165	0.001715	-0.3396	0.0007291	0.148	0.1275	-0.1963	0.01482	-0.0097	0.9547	0.05318	-0.1595	0.1799	-0.2312	0.03927	-0.1376	0.009582	-0.2876	0.007982	0.004101	-0.2637	0.0005835	-0.0119	0.8703
rs2280234	1	2	2	191558344	A	G	-0.0864	0.214	0.31	0.02513	2.958e-06	0.0554	0.5918	-0.3639	3.285e-06	-0.0072	0.9344	-0.1993	0.2717	0.5207	-0.1458	0.2546	0.0546	0.6622	-0.0559	0.3034	0.124	0.2568	0.0006573	-0.0241	0.7643	-0.2458	0.0001904
rs172111	1	2	3	38162998	T	C	0.4821	0.08274	-1.2412	0.04215	0.009729	-0.2925	0.5671	1.0599	0.0001023	NA	NA	NA	NA	NA	NA	NA	NA	NA	0.4821	0.08274	-1.2412	0.03964	0.009511	-0.2925	0.5668	0.9996	0.002558
rs4055824	1	2	3	71374729	A	G	0.1629	0.1593	-0.6762	0.003835	0.0006863	-0.1367	0.4068	0.5677	0.000448	0.1215	0.35	0.1711	0.5287	0.3415	0.2307	0.261	0.0493	0.7855	0.1435	0.09673	-0.3214	0.06785	0.00979	0.006	0.9625	0.3408	0.004412
rs1610263	1	2	3	100902548	A	T	-0.2058	0.02396	-0.4611	0.01421	0.001714	-0.3968	0.0007062	0.0513	0.7244	0.1633	0.1612	-0.198	0.4157	0.3633	0.0848	0.6405	0.2429	0.1348	-0.0661	0.3563	-0.3624	0.0142	0.008645	-0.2564	0.009064	0.1351	0.2091
rs8177197	1	2	3	134952220	A	G	-0.2234	0.04752	-0.6522	0.004198	0.002873	-0.5707	0.0008747	0.1001	0.511	0.2097	0.05972	-0.0963	0.6921	0.1688	0.1415	0.4471	0.2674	0.06689	-0.0039	0.9607	-0.3938	0.01724	0.03469	-0.2448	0.05204	0.1857	0.07611
rs1525889	1	2	3	134972723	A	C	0.1458	0.1251	0.7588	9.552e-05	0.0003393	0.552	0.0002644	-0.2002	0.09891	0.0373	0.7116	0.1899	0.3898	0.6654	0.1754	0.288	-0.0404	0.7488	0.0947	0.1703	0.5135	0.0004008	0.001736	0.3805	0.0006373	-0.1243	0.1523
rs5396	1	2	3	172227509	T	C	-0.0071	0.9282	-0.1875	0.218	1.001e-05	-0.097	0.368	0.3785	5.483e-07	0.0126	0.8802	-0.177	0.3393	0.804	-0.0624	0.624	0.1097	0.3229	0.0023	0.9681	-0.1826	0.1183	0.0001123	-0.0824	0.3159	0.2916	2.808e-06
rs1951233	1	2	4	74957715	A	G	0.1066	0.2587	-0.5727	0.003121	0.0001277	-0.2046	0.1683	0.464	0.0001307	-0.0369	0.7289	-0.0163	0.9446	0.8623	0.0455	0.8006	-0.1017	0.4605	0.0433	0.5388	-0.3505	0.01829	0.02042	-0.104	0.3635	0.218	0.01596
rs999357	1	2	4	77335141	C	G	0.2533	0.001891	0.2529	0.1369	0.0006926	0.3868	0.0003093	0.1022	0.4202	0.0832	0.3658	0.2274	0.2554	0.3977	0.2171	0.1154	-0.0371	0.7631	0.1779	0.00351	0.2426	0.05938	0.0007	0.3234	0.00013	0.0316	0.7183
rs1397613	1	2	4	120462377	T	G	-0.0209	0.7644	0.534	0.0001543	0.0004603	0.2319	0.02202	-0.3071	0.001882	0.0039	0.9624	-0.1942	0.2725	0.8548	-0.0327	0.801	0.0827	0.4549	-0.0107	0.8403	0.2548	0.02021	0.03186	0.132	0.09791	-0.1368	0.06159
rs1996025	1	2	4	149525557	T	C	-0.4134	0.06678	-1.0961	0.06878	0.009119	-0.8562	0.0001099	0.2441	0.5895	0.0951	0.7448	1.0466	0.08704	0.4481	0.4307	0.2771	-0.2496	0.5303	-0.2235	0.2105	-0.0545	0.8983	0.112	-0.4067	0.04584	-0.0127	0.9685
rs6882903	1	2	5	40801619	A	C	0.2783	0.0008054	-0.2611	0.1196	0.0005219	0.1653	0.1588	0.4193	0.0004831	NA	NA	NA	NA	NA	NA	NA	NA	NA	0.2784	0.0007773	-0.2654	0.11	0.0005028	0.1671	0.1536	0.4199	0.0003969
rs31315	1	2	5	110864184	T	C	0.0807	0.3081	-0.6574	5.459e-05	0.0002922	-0.2077	0.03716	0.4585	0.000387	-0.0015	0.9876	0.139	0.4764	0.6941	0.0631	0.6531	-0.1143	0.3667	0.0461	0.4458	-0.3344	0.007151	0.05856	-0.1164	0.1515	0.1701	0.05836
rs2243260	1	2	5	132040649	A	T	-0.8117	0.0005054	0.5623	0.2294	0.0009543	-0.5913	0.05942	-1.1099	0.0007956	NA	NA	NA	NA	NA	NA	NA	NA	NA	-0.8117	0.0005054	0.5623	0.2237	0.0009224	-0.4945	0.149	-1.1099	0.0006743
rs6580353	1	2	5	139390871	T	C	-0.1652	0.0213	-0.3485	0.01573	0.005089	-0.3332	0.000757	0.0166	0.874	0.0081	0.9304	-0.0235	0.9037	0.9581	0.0078	0.9589	-0.0008	0.9947	-0.1003	0.07645	-0.2354	0.04087	0.02884	-0.2313	0.005233	0.0093	0.9054
rs6924490	1	2	6	6145874	T	C	0.07	0.3363	0.0473	0.7427	1.122e-07	0.0503	0.6203	0.383	8.048e-09	-0.0014	0.987	-0.1263	0.4847	0.6229	-0.1542	0.2699	0.0578	0.607	0.0412	0.4573	-0.0205	0.8549	1.675e-06	-0.0182	0.824	0.2968	1.893e-07
rs783073	1	2	6	93745699	T	G	-0.0291	0.694	0.0062	0.9665	0.0009648	-0.0446	0.672	-0.2796	7.704e-05	-0.0498	0.5357	-0.1493	0.3681	0.557	-0.1238	0.3113	0.006	0.9583	-0.0388	0.4763	-0.0629	0.567	0.009379	-0.0784	0.3259	-0.1983	0.0009192
rs12524696	1	2	6	98577364	A	G	0.3013	0.009949	0.3453	0.1626	0.003927	0.5286	0.0001928	0.0982	0.6186	-0.177	0.2057	0.0622	0.8388	0.4226	-0.1935	0.395	-0.19	0.2904	0.1053	0.2397	0.2338	0.221	0.05309	0.3325	0.005594	-0.0572	0.665
rs35456108	1	2	6	101067473	T	C	-0.3888	0.06443	1.2549	0.008085	0.0003225	0.3264	0.3936	-0.8654	4.355e-05	-0.0293	0.9118	-0.4557	0.4531	0.9452	-0.0927	0.8335	-0.0417	0.9007	-0.2496	0.1294	0.6177	0.09565	0.002603	0.1624	0.5898	-0.6224	0.00052
rs10456855	1	2	6	107644898	T	C	-0.0405	0.5927	0.5078	0.0007658	0.003125	0.2244	0.02444	-0.3334	0.004169	-0.0851	0.2641	-0.3711	0.02267	0.09101	-0.2308	0.05795	0.0426	0.6749	-0.0627	0.2428	0.1053	0.3389	0.317	0.0408	0.5969	-0.1224	0.1077
rs11154887	1	2	6	137140877	A	T	0.0402	0.5782	-0.1687	0.252	1.668e-06	-0.0144	0.8859	0.3561	8.49e-07	-0.0895	0.3023	0.0852	0.6312	0.6364	-0.0508	0.7069	-0.0832	0.4729	-0.013	0.8151	-0.0655	0.5611	0.0005045	-0.0275	0.7326	0.232	0.0001473
rs9371491	1	2	6	151415348	A	T	-0.4175	0.03984	0.9408	0.03216	0.007047	0.0794	0.821	-0.7797	0.0009563	-0.1324	0.5324	0.1345	0.7604	0.7423	-0.0077	0.9818	-0.2403	0.4651	-0.2813	0.05508	0.5442	0.07853	0.01956	0.0324	0.8935	-0.5851	0.003409
rs9322340	1	2	6	152244191	T	C	0.3177	0.00148	-0.3486	0.08717	0.001583	0.162	0.2575	0.4888	0.0005613	0.0845	0.4945	0.4018	0.1067	0.1447	0.3189	0.07161	-0.1217	0.4938	0.2251	0.003737	-0.051	0.7449	0.01344	0.2247	0.04309	0.2552	0.02025
rs1913474	1	2	6	152250415	A	G	0.3195	0.00146	-0.3715	0.06928	0.001257	0.1549	0.2853	0.4946	0.0004176	0.0726	0.5586	0.3754	0.1334	0.177	0.2964	0.09791	-0.1337	0.4539	0.2215	0.00448	-0.0753	0.6323	0.01465	0.2117	0.05986	0.2585	0.01807
rs9341066	1	2	6	152461219	A	G	0.349	0.02212	-0.708	0.03968	0.0004077	0.0714	0.7931	0.6882	9.015e-05	-0.1827	0.5205	-0.4038	0.5609	0.8996	-0.3104	0.4905	0.0903	0.814	0.2314	0.08441	-0.6476	0.03408	0.001304	-0.1282	0.5943	0.5871	0.0002019
rs1525091	1	2	7	14759188	T	C	0.2546	0.00335	0.2332	0.1597	0.004187	0.4007	0.0009627	0.1221	0.3293	0.0369	0.6813	0.0687	0.7244	0.7326	0.077	0.594	0.0708	0.5452	0.1498	0.01627	0.1661	0.1859	0.01002	0.2675	0.003951	0.095	0.2632
rs1476597	1	2	7	30917267	C	G	0.3552	0.001693	-0.5443	0.02151	0.001675	0.1407	0.3041	0.7276	0.0004661	-0.1931	0.3066	-0.5078	0.1716	0.1299	-0.3323	0.2466	-0.0475	0.8534	0.2106	0.02981	-0.5342	0.007022	0.02082	0.0533	0.6656	0.4264	0.007838
rs740336	1	2	7	30978202	T	C	0.2544	0.02108	0.3976	0.08035	0.006941	0.4666	0.0009099	0.0168	0.9243	0.0825	0.4981	0.6556	0.01012	0.03267	0.4638	0.006931	-0.2162	0.2288	0.1766	0.03059	0.511	0.002454	0.0003467	0.4619	2.937e-05	-0.0961	0.4421
rs2453840	1	2	7	45920337	T	G	0.1994	0.1108	-0.8129	0.001403	0.0005767	-0.2608	0.1832	0.5532	0.0004911	-0.1759	0.2276	-0.2286	0.4642	0.1568	-0.4341	0.04019	0.0033	0.9868	0.0414	0.6627	-0.5823	0.002971	0.0007532	-0.3408	0.01773	0.343	0.005295
rs7786831	1	2	7	55157983	T	C	0.4461	0.0008291	0.4671	0.08536	0.0009157	0.6183	0.0002366	0.2289	0.2862	0.022	0.8953	-0.4094	0.2359	0.5355	-0.2273	0.3927	0.257	0.2241	0.2826	0.006679	0.1343	0.527	0.01229	0.3804	0.007347	0.2409	0.1077
rs3917553	1	2	7	94772025	T	C	0.1295	0.6416	-1.2236	0.03869	0.04864	-0.4726	0.3374	1.0323	0.0001552	0.0035	0.9936	-0.208	0.8253	0.9686	-0.0122	0.9847	0.0765	0.8933	0.0925	0.6923	-0.9415	0.05805	0.0829	-0.2996	0.441	0.5162	0.07013
rs854565	1	2	7	94786280	A	G	0.0403	0.6071	0.5199	0.0009686	0.00246	0.2798	0.007138	-0.2483	0.03521	0.0781	0.3543	-0.0493	0.7769	0.4748	0.0115	0.9322	0.1262	0.2543	0.0572	0.3176	0.2664	0.02183	0.08701	0.1804	0.02823	-0.0516	0.52
rs7793277	1	2	7	97197521	C	G	-0.014	0.842	0.1466	0.2982	0.01157	0.0255	0.8011	-0.3146	1.223e-05	0.1663	0.06245	0.0353	0.8537	0.1735	0.1751	0.1852	0.1683	0.1559	0.055	0.318	0.107	0.3424	0.1206	0.0812	0.3119	-0.1834	0.002752
rs1052897	1	2	7	100078707	A	T	0.3761	0.03046	-0.7501	0.03364	0.001086	0.1694	0.5594	0.7326	0.0008216	-0.2289	0.3621	0.4679	0.361	0.7031	-0.0553	0.893	-0.1636	0.6368	0.1813	0.2039	-0.3658	0.2053	0.02454	-0.0037	0.988	0.4816	0.008608
rs12666989	1	2	7	100324690	C	G	0.4434	0.001845	-0.6441	0.02389	0.0001329	0.0805	0.7257	0.7021	5.054e-05	0.271	0.09605	0.2515	0.4739	0.1769	0.266	0.337	0.2727	0.198	0.3681	0.0005874	-0.2935	0.1819	0.0002022	0.156	0.3773	0.5348	6.541e-05
rs13245899	1	2	7	100335067	A	G	-0.3729	0.004941	0.5905	0.02511	0.0002177	-0.0705	0.7359	-0.6328	0.00011	-0.0513	0.7197	-0.3989	0.1897	0.4706	-0.2007	0.3817	-0.0097	0.9581	-0.2236	0.02133	0.1723	0.384	0.006716	-0.1295	0.4018	-0.3657	0.002747
rs2060717	1	2	7	128167985	A	G	0.3572	0.1724	-0.8641	0.1201	0.1424	0.0023	0.9956	1.025	0.0005357	0.145	0.6627	-0.4062	0.685	0.6576	0.3186	0.3879	0.4015	0.6901	0.2776	0.1769	-0.7592	0.1152	0.1001	0.1829	0.505	0.6681	0.04276
rs7806048	1	2	7	151209684	A	G	-0.2911	0.02899	0.5909	0.03144	0.002612	0.0165	0.9358	-0.6031	0.0007647	0.2304	0.2156	0.5271	0.2781	0.3714	0.515	0.1253	-0.0268	0.9064	-0.114	0.2922	0.5774	0.01487	0.02161	0.15	0.3898	-0.3857	0.005775
rs10101206	1	2	8	9954874	C	G	-0.2925	0.002014	-0.3477	0.08283	0.0007948	-0.435	0.0003344	-0.07	0.6583	-0.2109	0.049	-0.2496	0.274	0.177	-0.3819	0.02637	-0.1387	0.3375	-0.2565	0.0002971	-0.3055	0.04125	0.0001984	-0.4178	2.438e-05	-0.1068	0.3142
rs1905629	1	2	8	10070453	A	G	0.3462	0.007095	-0.531	0.04074	0.0007161	0.1064	0.5541	0.6447	0.0001182	0.0205	0.9054	-0.036	0.9177	0.9524	-0.0031	0.9916	0.0578	0.791	0.2305	0.02505	-0.3564	0.08452	0.006943	0.0641	0.6838	0.4308	0.001066
rs7842443	1	2	8	10267454	A	T	-0.1909	0.04113	-0.4945	0.01122	0.00183	-0.4191	0.0002517	0.0738	0.6276	0.0732	0.5066	0.0379	0.8726	0.8391	0.051	0.7699	0.1295	0.3884	-0.0804	0.2587	-0.2823	0.05894	0.0154	-0.2777	0.003641	0.1025	0.3343
rs4841600	1	2	8	11725557	T	C	-0.1065	0.1415	0.0447	0.7589	1.16e-05	-0.0867	0.3781	-0.2829	0.0001496	0.0457	0.5819	0.1602	0.3689	0.6584	0.0891	0.4586	0.0127	0.9111	-0.0411	0.4508	0.0905	0.4198	0.0002732	-0.0163	0.8303	-0.1933	0.001873
rs6993043	1	2	8	32084730	T	C	-0.174	0.04625	0.2461	0.1325	0.01062	-0.0517	0.6777	-0.3973	0.0007379	0.0103	0.9066	-0.0787	0.6872	0.7809	-0.0609	0.6839	0.057	0.6244	-0.0836	0.1768	0.1135	0.3629	0.2044	-0.056	0.5575	-0.1687	0.04043
rs939077	1	2	8	32365080	T	G	0.2261	0.006409	-0.3467	0.03533	0.001757	0.0428	0.718	0.4007	0.0005893	-0.0041	0.9664	-0.2227	0.2885	0.5475	-0.158	0.312	0.0891	0.4664	0.1287	0.04027	-0.3011	0.01937	0.008262	-0.0311	0.7414	0.2543	0.00241
rs6474389	1	2	8	42306869	A	G	0.1164	0.2117	-0.6438	0.0008907	0.003464	-0.1747	0.1464	0.4603	0.002171	-0.1964	0.04108	-0.1817	0.3882	0.06024	-0.3017	0.04579	-0.0798	0.5291	-0.0341	0.6097	-0.4337	0.002214	0.01978	-0.223	0.01767	0.1485	0.1233
rs9282808	1	2	8	54304433	T	C	-0.0893	0.5505	-1.2188	0.0002527	0.0006756	-0.6741	0.00984	0.424	0.01692	0.3061	0.03731	0.2368	0.4241	0.06816	0.3109	0.1535	0.1949	0.3699	0.1125	0.2827	-0.4137	0.06041	0.05323	-0.1115	0.5196	0.3341	0.01431
rs7000650	1	2	8	68117812	T	C	-0.4159	0.008869	1.108	0.002702	0.001751	-0.0244	0.8923	-1.0734	0.0005647	0.0919	0.5541	-0.1743	0.6028	0.6999	0.075	0.7583	0.1641	0.4187	-0.1568	0.1578	0.4127	0.09463	0.4729	0.0202	0.8904	-0.2121	0.2104
rs7829028	1	2	8	110178706	T	C	-0.1432	0.04065	-0.403	0.004028	0.00184	-0.3515	0.0002662	0.0542	0.5949	0.0092	0.9128	-0.0034	0.9854	0.8543	0.028	0.8297	-0.044	0.697	-0.0802	0.1359	-0.2583	0.01984	0.03978	-0.217	0.005024	0.0111	0.883
rs6982383	1	2	8	126548591	A	G	-0.1345	0.2156	0.8782	0.0001043	0.0001665	0.3798	0.0274	-0.5287	0.0002248	-0.3058	0.009396	0.1175	0.6373	0.02679	-0.1804	0.3024	-0.3649	0.01698	-0.2121	0.007832	0.5394	0.001197	4.906e-05	0.0917	0.4577	-0.453	1.27e-05
rs4645961	1	2	8	128820198	A	G	0.5721	0.0004677	-0.6125	0.08522	7.239e-05	0.1586	0.5828	0.8308	2.267e-05	-0.0823	0.8187	-1.414	0.1078	0.1365	-1.2372	0.1063	0.2947	0.4417	0.4616	0.001883	-0.7211	0.02729	0.0001037	-0.0148	0.9564	0.7243	3.77e-05
rs7831261	1	2	8	135416154	A	C	-0.1355	0.115	-0.5619	0.001297	0.0007153	-0.4395	9.912e-05	0.2117	0.1203	-0.1257	0.1766	-0.0767	0.6915	0.3786	-0.1487	0.3116	-0.1266	0.2891	-0.1307	0.03819	-0.347	0.007096	0.001618	-0.3311	0.0002145	0.0231	0.7956
rs1995983	1	2	8	138945810	A	C	-0.1327	0.0693	0.0147	0.9214	9.594e-06	-0.119	0.2399	-0.2973	0.0001078	0.0408	0.6179	-0.2793	0.1116	0.2349	-0.0842	0.5301	0.1211	0.2643	-0.0564	0.3002	-0.108	0.3386	0.00335	-0.1065	0.1871	-0.1573	0.01169
rs11466462	1	2	9	100935092	C	G	1.2938	0.0001252	-1.7088	0.0261	5.713e-06	0.6	0.3247	1.7245	0.0003372	0.3049	0.1565	-0.427	0.3472	0.1921	0.0966	0.7968	0.3762	0.2135	0.5951	0.0009905	-0.7592	0.05219	0.0001306	0.2402	0.4513	0.7612	0.00285
rs4979261	1	2	9	115395236	A	G	0.1116	0.1319	0.4826	0.001047	0.002887	0.3424	0.0009035	-0.1369	0.1975	-0.0872	0.3238	0.0544	0.769	0.5248	-0.0078	0.9554	-0.1139	0.3549	0.0299	0.598	0.3191	0.005349	0.01312	0.2185	0.008371	-0.1266	0.1126
rs10881583	1	2	9	136407260	T	C	0.1412	0.6524	-1.7	0.0067	0.00227	-0.8604	0.1078	1.0706	0.0001098	-0.2098	0.03367	0.0988	0.6327	0.096	-0.2102	0.1646	-0.2256	0.0991	-0.1777	0.05915	-0.0777	0.6924	0.433	-0.2604	0.07316	0.0288	0.8144
rs1801232	1	2	10	16910918	T	G	0.7768	8.18e-06	0.6946	0.1074	4.676e-07	0.9674	5.043e-07	0.2716	0.4858	0.0012	0.9973	1.389	0.06376	0.1667	1.2862	0.04184	-0.3119	0.464	0.6236	6.415e-05	0.8643	0.01963	1.328e-07	1.024	5.502e-08	0.0097	0.9729
rs7100526	1	2	10	83709868	T	C	-0.0622	0.3713	0.5136	0.0001588	0.0005488	0.1554	0.1059	-0.28	0.00679	0.0359	0.6492	-0.1568	0.3174	0.6739	-0.0264	0.8231	0.0653	0.5542	-0.0197	0.705	0.2272	0.02621	0.07563	0.0834	0.2626	-0.1208	0.1072
rs12572315	1	2	10	83765831	A	G	-0.3309	0.07043	-0.6284	0.09943	0.01815	-0.7142	0.0006679	-0.0031	0.9921	-0.1855	0.3082	0.1399	0.7187	0.3857	-0.1431	0.6159	-0.2659	0.2755	-0.2578	0.04552	-0.2561	0.344	0.03161	-0.4719	0.006602	-0.1627	0.392
rs1416847	1	2	10	84379594	A	T	0.0103	0.9045	-0.8227	3.713e-06	1.296e-05	-0.3487	0.0009469	0.4545	0.001558	-0.097	0.2955	-0.2603	0.2165	0.2065	-0.3374	0.0184	-0.0081	0.9473	-0.04	0.5258	-0.5919	1.173e-05	9.329e-05	-0.3451	4.689e-05	0.1893	0.04091
rs1339797	1	2	10	84394962	A	C	0.0674	0.4224	-0.5617	0.0009964	0.004608	-0.1736	0.1051	0.3631	0.005745	-0.1154	0.1999	-0.3277	0.09432	0.1599	-0.3199	0.02066	0.0122	0.9202	-0.0181	0.7678	-0.4612	0.0003107	0.006311	-0.2287	0.006835	0.1765	0.04691
rs17095403	1	2	10	84408758	A	G	-0.0007	0.996	-0.9422	0.0009455	0.0004592	-0.4278	0.006685	0.5349	0.02123	-0.0524	0.6989	0.1991	0.532	0.4661	-0.0094	0.9622	-0.2458	0.2094	-0.0282	0.7683	-0.4385	0.03785	0.07908	-0.2612	0.03697	0.0839	0.5728
rs7903129	1	2	10	84413247	A	G	-0.0285	0.7595	0.6271	0.0007258	0.003193	0.2253	0.06367	-0.351	0.01385	0.0823	0.4021	-0.1475	0.4741	0.7209	0.0789	0.5912	0.1073	0.4077	0.0242	0.7197	0.2813	0.04012	0.06289	0.1665	0.07502	-0.1028	0.2808
rs7086223	1	2	10	84427173	A	G	-0.0062	0.9428	0.5824	0.0009521	0.002527	0.2477	0.02881	-0.3414	0.01154	0.0268	0.7565	0.1745	0.3324	0.4692	0.1671	0.2095	-0.0972	0.3904	0.0104	0.8639	0.3839	0.002175	0.005718	0.2149	0.01266	-0.1994	0.02084
rs2484455	1	2	10	84431822	A	T	0.0122	0.8762	0.5188	0.0009743	0.003286	0.2545	0.01899	-0.2483	0.02935	0.0177	0.8248	0.0821	0.6248	0.813	0.0821	0.5092	-0.0453	0.6684	0.015	0.7879	0.3164	0.00556	0.01822	0.1804	0.02712	-0.1411	0.06713
rs2484456	1	2	10	84432025	A	G	0.076	0.3225	-0.6298	3.398e-05	3.36e-05	-0.2379	0.02608	0.4043	0.0001836	0.0115	0.8912	0.0529	0.7692	0.9277	-0.0271	0.8355	0.0433	0.7022	0.0467	0.4105	-0.35	0.002425	0.00164	-0.1547	0.06106	0.2349	0.002485
rs10509458	1	2	10	84439407	A	G	-0.0121	0.8951	-0.7194	0.0001796	0.0004479	-0.2965	0.008459	0.4018	0.01009	-0.0026	0.9786	-0.0815	0.6961	0.7451	-0.1181	0.4315	0.0656	0.6055	-0.0082	0.9015	-0.4295	0.002238	0.003499	-0.233	0.009564	0.2021	0.03926
rs12256509	1	2	10	84439430	A	G	0.0036	0.9619	-0.532	0.0003473	0.001349	-0.222	0.02595	0.2686	0.01608	-0.1386	0.07874	-0.0902	0.5781	0.1784	-0.2163	0.06255	-0.1054	0.3226	-0.064	0.2369	-0.3326	0.002281	0.009117	-0.2197	0.003633	0.0759	0.3218
rs2783413	1	2	10	84445295	A	G	0.07	0.3712	-0.5452	0.0004649	0.001058	-0.1823	0.1026	0.3334	0.002061	-0.0985	0.2539	0.0054	0.9768	0.5308	-0.1294	0.32	-0.0596	0.6103	-0.0063	0.9128	-0.3212	0.00681	0.03016	-0.1601	0.05852	0.1549	0.04941
rs10082425	1	2	10	84449973	T	C	-0.0056	0.9375	0.6124	2.407e-05	3.059e-05	0.2637	0.00508	-0.3387	0.002233	0.0745	0.3512	0.0019	0.9905	0.614	0.1272	0.2522	0.0568	0.6047	0.0302	0.5709	0.3389	0.00146	0.0014	0.2073	0.003843	-0.1423	0.06623
rs1572333	1	2	10	84452727	A	G	-0.0576	0.4948	0.6635	8.058e-05	0.000157	0.2469	0.04707	-0.3957	0.0005912	0.0633	0.4858	-0.0975	0.5999	0.8381	0.1005	0.4422	0.0264	0.8328	-0.0015	0.9808	0.3246	0.008848	0.01118	0.1774	0.04873	-0.2049	0.01484
rs2992382	1	2	10	84455276	C	G	-0.092	0.2763	0.6675	6.418e-05	7.212e-05	0.219	0.07769	-0.4318	0.0001627	0.0647	0.4777	-0.0863	0.6481	0.8195	0.0972	0.4649	0.0298	0.8147	-0.0195	0.7528	0.3412	0.0061	0.007973	0.1623	0.07339	-0.2281	0.006897
rs1889710	1	2	10	84458809	T	G	0.0555	0.4425	-0.5349	0.0002734	0.0007751	-0.1669	0.0843	0.3285	0.003221	-0.0864	0.298	-0.1008	0.5531	0.4263	-0.1485	0.2107	-0.0294	0.8004	-0.0057	0.9166	-0.352	0.001447	0.006341	-0.1594	0.03324	0.1598	0.04544
rs1335625	1	2	10	84469535	A	G	-0.1936	0.01705	0.484	0.003033	0.0007133	0.0242	0.826	-0.4258	0.0004876	0.0907	0.3245	-0.0702	0.7161	0.6351	0.086	0.5375	0.0969	0.4386	-0.0691	0.2557	0.255	0.03956	0.08671	0.0478	0.579	-0.1746	0.04421
rs1333209	1	2	10	84543927	A	C	-0.2021	0.1712	-0.9665	0.001438	0.0005148	-0.6281	0.0003375	0.2892	0.2408	0.0979	0.5394	0.2797	0.4393	0.6168	0.1941	0.4382	-0.0651	0.7663	-0.066	0.5421	-0.4558	0.04852	0.04308	-0.3485	0.017	0.0935	0.5658
rs10885542	1	2	10	84720554	A	G	-0.1479	0.04381	-0.4446	0.002868	0.001231	-0.3494	0.000375	0.0941	0.3984	0.0991	0.2289	0.1801	0.3044	0.4767	0.1144	0.371	0.0566	0.6137	-0.0391	0.475	-0.1846	0.1019	0.07008	-0.1777	0.02235	0.0756	0.3359
rs2295933	1	2	10	84735236	T	C	0.1322	0.07432	0.4806	0.001448	0.0008909	0.3453	0.0004576	-0.1353	0.237	-0.0901	0.2755	-0.0968	0.5787	0.5655	-0.0726	0.5763	-0.0723	0.5167	0.0338	0.5402	0.2352	0.03798	0.03711	0.1932	0.01375	-0.1033	0.193
rs1361355	1	2	10	107855507	A	G	-0.4352	0.0298	0.8477	0.03435	0.002331	-0.0566	0.8571	-0.8336	0.000952	-0.2841	0.3043	-0.7221	0.2054	0.2847	-0.4383	0.2039	-0.119	0.7772	-0.3829	0.01809	0.3363	0.3013	0.003657	-0.2297	0.3227	-0.6481	0.002474
rs4918792	1	2	10	114833939	A	G	NA	NA	NA	NA	NA	NA	NA	1.2012	0.0005788	0.6941	0.1733	-1.1333	0.2201	0.1055	0.1566	0.8344	1.3052	0.01644	0.6941	0.1733	-1.1333	0.2201	0.1055	0.1566	0.8344	1.3052	0.01644
rs11575685	1	2	10	115329964	T	C	0.2491	0.07356	-0.6454	0.02094	0.004766	-0.0707	0.7457	0.5803	0.0008726	0.406	0.0195	0.2381	0.5151	0.01143	0.5549	0.0291	0.4451	0.06879	0.3098	0.004329	-0.3236	0.1423	0.0007655	0.1937	0.2414	0.5355	0.0001413
rs2286742	1	2	10	115330482	A	G	-0.165	0.03381	-0.4157	0.008101	0.002243	-0.3709	0.0003794	0.0678	0.5583	-0.0575	0.4819	0.0886	0.6103	0.6694	-0.0341	0.787	-0.1022	0.3686	-0.1145	0.042	-0.1915	0.09833	0.02342	-0.2346	0.003501	-0.0181	0.8225
rs1800443	1	2	11	629830	T	G	-0.4349	0.00386	-0.3641	0.2561	0.002143	-0.6587	0.0004744	-0.2049	0.3733	-0.297	0.1164	-0.0058	0.9889	0.2835	-0.2245	0.4385	-0.3132	0.2133	-0.38	0.001245	-0.2341	0.3538	0.001229	-0.5298	0.0007923	-0.1883	0.2782
rs12282937	1	2	11	2555128	A	G	-0.0203	0.7902	-0.5252	0.0006279	0.003491	-0.2753	0.01007	0.2378	0.03258	0.107	0.2597	0.3924	0.05178	0.1252	0.2731	0.05677	-0.0431	0.7343	0.0292	0.6235	-0.1931	0.1117	0.2224	-0.0792	0.3547	0.1174	0.1579
rs2156918	1	2	11	5253468	C	G	0.11	0.2269	0.6208	0.0009048	0.001368	0.3928	0.0008807	-0.2446	0.08931	-0.1642	0.1328	-0.3547	0.1488	0.1563	-0.3438	0.06808	-0.057	0.6738	-0.0016	0.9815	0.2669	0.07104	0.08592	0.1856	0.06321	-0.1462	0.136
rs12279642	1	2	11	13293058	A	G	-0.3115	0.01894	0.4893	0.08324	0.0001514	-0.0318	0.8784	-0.6953	2.047e-05	-0.2889	0.06348	-0.249	0.4696	0.0639	-0.499	0.02104	-0.0861	0.6979	-0.3028	0.00267	0.194	0.3713	0.0001735	-0.2554	0.08785	-0.485	0.0001975
rs17463551	1	2	11	16387773	T	C	0.6144	0.03002	-1.0228	0.06804	0.003862	0.3721	0.3289	1.1754	0.0004799	0.3735	0.415	-0.1221	0.91	0.7208	0.1917	0.7875	0.5235	0.4984	0.5479	0.02295	-0.8356	0.0899	0.00398	0.1051	0.7829	1.0684	0.0008276
rs3751031	1	2	11	35117652	T	C	-0.4447	0.01623	1.1591	0.001928	5.896e-05	0.1112	0.6864	-1.037	1.079e-05	0.0321	0.8991	0.6692	0.2616	0.9802	-0.0077	0.9837	-0.1187	0.7543	-0.2784	0.06223	1.0233	0.001112	0.0009552	0.07	0.7531	-0.8115	8.965e-05
rs4755576	1	2	11	41556748	A	G	-0.219	0.1069	0.8594	0.001498	9.922e-05	0.2132	0.3142	-0.6353	8.784e-05	-0.0743	0.6195	-0.1161	0.708	0.7325	-0.0096	0.9704	-0.0165	0.9272	-0.1537	0.1262	0.4454	0.02792	0.002341	0.1255	0.4502	-0.364	0.002373
rs510715	1	2	11	60371452	A	G	-0.0096	0.9005	0.071	0.6417	0.0002836	0.038	0.7251	-0.3082	0.00044	-0.03	0.7224	0.1239	0.4843	0.7685	0.0008	0.9951	-0.0609	0.5854	-0.019	0.7369	0.092	0.4235	0.00137	0.0231	0.7825	-0.2117	0.002049
rs2507821	1	2	11	62423182	T	G	0.1225	0.0975	-0.4222	0.005848	0.007834	-0.0807	0.4011	0.4154	0.0006946	0.0073	0.9328	-0.1471	0.4292	0.5212	-0.1058	0.3867	0.0682	0.5892	0.0742	0.1862	-0.3142	0.00751	0.01325	-0.0899	0.2337	0.2493	0.004285
rs7105001	1	2	11	69729597	T	C	-0.1333	0.06471	0.1015	0.4907	6.569e-06	-0.1121	0.2628	-0.3717	9.389e-06	-0.0396	0.6577	-0.3334	0.08359	0.09958	-0.2582	0.0587	0.0916	0.4523	-0.0957	0.08748	-0.0585	0.6149	0.0002458	-0.1625	0.04373	-0.2214	0.001288
rs366068	1	2	11	72014212	A	G	-0.1169	0.1091	0.4135	0.005324	0.004386	0.0989	0.3155	-0.3775	0.0005017	0.0098	0.9056	0.064	0.7131	0.884	0.0504	0.6985	-0.0295	0.7919	-0.0614	0.2608	0.2697	0.01629	0.0357	0.0803	0.3059	-0.2107	0.006464
rs12803625	1	2	11	88848323	A	G	-0.2482	0.05916	0.6992	0.01333	0.002632	0.1373	0.5287	-0.5773	0.0004433	-0.098	0.6313	-0.412	0.4182	0.8891	-0.1495	0.6568	-0.2405	0.3499	-0.2043	0.06419	0.445	0.06944	0.00722	0.0537	0.7687	-0.4818	0.0004456
rs603050	1	2	11	102185439	T	C	0.0167	0.8286	-0.5715	0.0002788	0.001198	-0.2345	0.03054	0.2901	0.01043	-0.1829	0.03757	-0.046	0.8029	0.116	-0.1918	0.1294	-0.1803	0.1369	-0.07	0.2264	-0.3529	0.002998	0.01385	-0.2162	0.008554	0.0741	0.3673
rs4252591	1	2	11	111290133	T	C	0.1721	0.1264	-0.4611	0.03504	0.00212	-0.0762	0.6436	0.5932	3.912e-05	0.0998	0.4353	-0.2889	0.2713	0.3907	-0.0451	0.8388	0.2459	0.1335	0.1411	0.09461	-0.3908	0.01935	0.002166	-0.0638	0.6289	0.4394	4.462e-05
rs10891319	1	2	11	111472815	A	G	-0.1833	0.0517	0.2852	0.1241	0.007183	-0.0526	0.6842	-0.4552	0.0004978	-0.0709	0.5185	-0.1728	0.4241	0.169	-0.2717	0.08637	0.0071	0.9616	-0.1357	0.05748	0.0932	0.5053	0.02628	-0.141	0.1588	-0.2507	0.009803
rs35361223	1	2	11	111555267	C	G	NA	NA	NA	NA	NA	NA	NA	-1.5954	0.0001695	1.3824	0.3345	-4.7445	0.2854	0.2919	1.1158	0.3854	4.1734	0.125	1.3824	0.3345	-4.7445	0.2854	0.2919	1.1158	0.3854	4.1734	0.125
rs4252260	1	2	11	117367627	T	C	-0.2843	0.3776	2.6033	0.01323	0.0006799	0.3575	0.5985	-1.0983	0.0006738	NA	NA	NA	NA	NA	NA	NA	NA	NA	-0.2843	0.3776	2.6033	0.01212	0.000656	1.539	0.1237	-1.0983	0.0005686
rs123266	1	2	12	2596522	T	G	0.25	0.008311	-0.561	0.003309	8.365e-05	-0.0555	0.6985	0.5574	1.029e-05	0.0306	0.7998	-0.062	0.805	0.8213	0.0472	0.8051	0.0714	0.6546	0.167	0.02484	-0.3799	0.01187	0.0008097	-0.0191	0.8673	0.3721	0.0001541
rs7980903	1	2	12	12182905	T	C	0.0594	0.5888	-0.9528	0.0001229	0.0003964	-0.308	0.01657	0.6483	0.002423	0.0836	0.4759	-0.2835	0.2628	0.442	-0.0248	0.8928	0.1446	0.3817	0.0711	0.3745	-0.6296	0.0003543	0.001465	-0.2143	0.04162	0.3365	0.009709
rs2302685	1	2	12	12193165	T	C	0.0756	0.493	-0.9379	0.0001584	0.0005508	-0.2883	0.02663	0.6495	0.002297	0.0747	0.5269	-0.3381	0.181	0.2809	-0.0967	0.591	0.1777	0.2916	0.0756	0.3477	-0.6477	0.0002368	0.0007895	-0.222	0.03504	0.3625	0.005829
rs16928173	1	2	12	24942532	T	G	0.2621	0.002321	-0.3358	0.05583	0.0006189	0.0974	0.4311	0.4547	0.0002672	0.0636	0.617	0.3188	0.251	0.4854	0.1694	0.3768	-0.043	0.8045	0.2004	0.004872	-0.1513	0.3045	0.006822	0.1196	0.249	0.289	0.004034
rs12320158	1	2	12	24943451	T	C	0.1599	0.04015	-0.3811	0.01518	0.003895	-0.0104	0.9262	0.3694	0.0007802	-0.0894	0.288	-0.1708	0.317	0.4881	-0.1427	0.2794	-0.0458	0.6844	0.0449	0.4318	-0.2861	0.01273	0.05784	-0.0652	0.4458	0.17	0.02969
rs12306662	1	2	12	42664581	A	G	-0.0747	0.3145	0.1926	0.1946	0.0001227	0.0218	0.8309	-0.3976	8.203e-06	-0.0341	0.7007	0.2652	0.147	0.4493	0.0587	0.6728	-0.157	0.1826	-0.0584	0.3052	0.2203	0.0546	0.000252	0.0345	0.6749	-0.3078	1.354e-05
rs12301507	1	2	12	42680469	T	G	-0.0072	0.9236	0.3354	0.02489	0.0006002	0.1318	0.2264	-0.343	0.0002763	0.1297	0.1289	-0.1136	0.5344	0.07593	-0.0479	0.7181	0.2905	0.01235	0.052	0.3566	0.1567	0.1734	0.2362	0.06	0.4754	-0.0918	0.2071
rs35264874	1	2	12	55826639	T	C	2.8221	0.000555	-1.7073	0.1792	0.0001693	1.4524	0.07143	3.6157	9.221e-05	-2.5468	0.2284	-4.3706	0.1701	0.3604	-4.5171	0.104	2.089	0.2695	2.133	0.004863	-2.0731	0.07906	0.002542	1.0098	0.362	3.3213	6.389e-05
rs35617674	1	2	12	55881635	T	C	0.2865	0.1069	-0.8028	0.03072	0.003111	-0.0689	0.796	0.7287	0.0004403	0.0994	0.67	-0.4448	0.3756	0.7148	0.0788	0.8425	0.1845	0.5323	0.2188	0.1209	-0.6772	0.02246	0.006382	-0.0209	0.9247	0.5523	0.00102
rs7978567	1	2	12	55882251	T	C	0.0866	0.2136	-0.4701	0.0009154	0.001223	-0.1185	0.1959	0.3924	0.0002652	0.0265	0.76	0.0023	0.9899	0.8894	0.1236	0.3478	-0.0009	0.9941	0.0638	0.2394	-0.2902	0.008507	0.0241	-0.0392	0.6022	0.219	0.005787
rs3759292	1	2	12	61833580	A	G	-0.7124	0.01087	-0.9797	0.1117	0.002379	-1.1418	0.0004936	-0.1802	0.6863	-0.1509	0.7327	0.4238	0.6146	0.9091	0.0606	0.9361	-0.0249	0.9634	-0.5517	0.01957	-0.4981	0.3123	0.007496	-0.9518	0.001535	-0.0729	0.8451
rs7975512	1	2	12	97323500	T	C	0.0449	0.6311	0.6516	0.0006066	0.003774	0.3797	0.008171	-0.2783	0.03043	-0.216	0.02151	0.0801	0.6893	0.07147	-0.2147	0.1309	-0.263	0.04935	-0.0845	0.2022	0.3839	0.005096	0.01929	0.0796	0.4302	-0.271	0.003251
rs2075440	1	2	12	108343483	A	G	0.0362	0.6253	-0.0947	0.5218	2.808e-05	-0.0012	0.9909	0.3114	0.000311	0.1579	0.05735	-0.0777	0.6643	0.1501	0.0792	0.536	0.2185	0.04984	0.0901	0.1026	-0.0869	0.443	1.273e-05	0.0301	0.705	0.2742	5.402e-05
rs968529	1	2	12	110718751	T	C	NA	NA	NA	NA	NA	2.3069	3.89e-05	NA	NA	0.2304	0.851	-4.7073	0.2989	0.5138	-4.0109	0.414	0.4805	0.7073	0.2304	0.851	-4.7073	0.2989	0.5138	-4.0109	0.414	0.4805	0.7073
rs2272310	1	2	12	123837631	T	C	0.4434	0.2032	2.5922	0.01645	0.002651	1.3115	0.0008368	-0.002	0.9973	0.2487	0.07426	0.1387	0.6322	0.1636	0.2843	0.1753	0.2631	0.191	0.2762	0.03235	0.3034	0.2785	0.01613	0.5125	0.005593	0.2086	0.2906
rs838910	1	2	12	123853333	A	C	0.1221	0.1337	0.514	0.001787	0.00187	0.356	0.0005823	-0.1585	0.2188	0.0474	0.6161	0.23	0.2274	0.4417	0.137	0.3341	0.0208	0.8746	0.0905	0.1418	0.3936	0.001477	0.002343	0.2793	0.0008249	-0.0718	0.4331
rs12297372	1	2	12	123869846	T	C	-0.3406	0.00811	-0.5665	0.03434	0.002827	-0.5667	0.0004981	-0.1034	0.6255	-0.2706	0.2866	-0.3181	0.5948	0.1792	-0.6604	0.08341	0.1852	0.6048	-0.3282	0.004157	-0.5242	0.03058	0.0005684	-0.5831	9.523e-05	-0.0289	0.873
rs2147188	1	2	13	27809980	A	G	-0.1912	0.2243	1.0022	0.00306	0.002045	0.3917	0.1513	-0.684	0.0004384	-0.3488	0.03028	0.1027	0.779	0.06074	-0.4217	0.07224	-0.3008	0.2079	-0.268	0.01716	0.5922	0.01648	0.001899	-0.0758	0.67	-0.5142	0.0006849
rs206119	1	2	13	31787968	A	G	-0.261	0.0004355	0.2659	0.07799	0.0002074	-0.1162	0.2607	-0.3737	0.0008252	-0.2037	0.01446	0.0888	0.602	0.04091	-0.1691	0.1502	-0.1871	0.1161	-0.2369	1.847e-05	0.1891	0.09218	1.928e-05	-0.1392	0.07254	-0.288	0.0003704
rs1537063	1	2	13	77426235	T	C	0.653	0.0006984	-0.5528	0.1596	0.0008273	0.4532	0.1052	0.9213	0.0005881	0.1723	0.5399	0.622	0.4423	0.2574	0.6221	0.1306	0.2736	0.4777	0.499	0.001666	-0.3328	0.3422	0.001036	0.4641	0.05009	0.714	0.001058
rs9515517	1	2	13	88498193	T	C	-0.2638	0.003113	0.4145	0.01783	0.0003032	-0.0458	0.737	-0.4982	2.427e-05	0.0673	0.5186	-0.171	0.414	0.7276	0.1631	0.3208	-0.0018	0.9901	-0.1232	0.06874	0.1755	0.1883	0.03854	0.0397	0.7052	-0.2975	0.0009641
rs16950669	1	2	13	94593078	A	G	0.4047	0.005087	-0.4441	0.1395	0.003532	0.1512	0.5079	0.6625	0.0007095	-0.165	0.3763	-0.0191	0.9621	0.8603	-0.1432	0.6234	-0.0876	0.7059	0.1921	0.09218	-0.293	0.2202	0.07758	0.0424	0.8135	0.3534	0.01737
rs9588132	1	2	13	109735076	A	C	0.1653	0.0291	-0.0852	0.5778	0.0001217	0.2481	0.00282	0.2095	0.0872	-0.1621	0.06974	0.5182	0.005365	0.00349	0.1677	0.2242	-0.3845	0.001463	0.0279	0.6287	0.1546	0.1882	0.0001925	0.2299	0.001155	-0.0876	0.3053
rs17122962	1	2	14	22372405	A	G	-0.2121	0.005551	-0.0867	0.5786	4.526e-07	-0.3656	9.429e-05	-0.1624	0.175	0.1955	0.06829	-0.0241	0.9187	0.1352	0.2183	0.1584	0.1644	0.29	-0.0742	0.2327	-0.0675	0.6019	0.0006174	-0.2138	0.007352	-0.0423	0.6527
rs12892900	1	2	14	32234101	T	G	0.2878	0.01105	-0.427	0.06322	0.003324	0.0896	0.5919	0.5546	0.0004615	0.1755	0.1802	0.0172	0.9476	0.2723	0.2576	0.2058	0.0947	0.6167	0.2394	0.005142	-0.2355	0.1703	0.003288	0.1571	0.2234	0.3672	0.002319
rs11628377	1	2	14	33321966	A	C	NA	NA	NA	NA	NA	2.1505	9.705e-06	NA	NA	0.0163	0.981	1.4394	0.4115	0.7888	0.5794	0.32	-0.0432	0.9659	0.0163	0.981	1.4394	0.4115	0.7888	0.5794	0.32	-0.0432	0.9659
rs9323599	1	2	14	74025432	T	C	-0.2096	0.02221	0.4631	0.01243	0.0009414	0.0446	0.7533	-0.4163	0.0002759	-0.1865	0.07014	0.202	0.3926	0.1363	-0.0207	0.9038	-0.2716	0.04792	-0.199	0.003632	0.3655	0.0116	0.000226	0.0187	0.8639	-0.3582	4.01e-05
rs7168956	1	2	15	32879670	A	G	0.616	0.002933	-0.905	0.03158	0.0005282	0.335	0.2554	1.0928	0.0001051	0.1689	0.4932	0.1385	0.7998	0.7427	0.2793	0.4597	0.2515	0.4577	0.4306	0.006562	-0.5214	0.1153	0.005111	0.2625	0.2681	0.7542	0.0004475
rs4244559	1	2	15	35159903	T	C	-0.1939	0.008136	-0.3281	0.02856	0.001834	-0.3647	0.0002206	-0.0429	0.6961	-0.0764	0.3597	-0.2123	0.2408	0.2619	-0.2055	0.1124	-0.0161	0.8865	-0.1433	0.009142	-0.2832	0.0136	0.0007013	-0.3063	9.353e-05	-0.0291	0.7098
rs140637	1	2	15	46554147	A	G	-0.6379	0.001408	-1.2678	0.006038	2.752e-06	-1.0705	8.756e-08	0.1248	0.759	-0.5269	0.01613	-0.7249	0.1262	0.006889	-0.9412	0.00534	0.0054	0.9869	-0.5883	6.669e-05	-1.0061	0.00222	2.211e-08	-1.068	2.867e-09	0.0549	0.8298
rs11634134	1	2	15	56543607	A	T	-0.0838	0.2471	-0.0992	0.4859	0.00147	-0.1714	0.09589	-0.2391	0.0008407	0.0463	0.5704	0.071	0.682	0.7768	0.1242	0.3429	-0.0031	0.977	-0.0262	0.6276	-0.033	0.7631	0.02516	-0.0586	0.4686	-0.1638	0.005578
rs4775058	1	2	15	56564570	A	G	0.4869	0.003174	0.6041	0.1044	0.0006947	0.6805	0.0002891	0.3775	0.1822	0.3028	0.1348	-0.2248	0.6315	0.09333	-0.0165	0.9631	0.5763	0.02096	0.413	0.001235	0.2879	0.3197	0.0008043	0.5287	0.001437	0.4001	0.03914
rs7166842	1	2	15	79395927	A	T	-0.3264	0.008885	-0.4359	0.0858	0.002988	-0.5412	0.0005463	-0.1145	0.5598	0.1522	0.3462	0.5658	0.1047	0.1631	0.5053	0.08321	-0.0665	0.7373	-0.148	0.1334	-0.095	0.641	0.1186	-0.2907	0.04124	-0.0911	0.5108
rs12898974	1	2	15	91786673	C	G	0.1616	0.4216	-1.2461	0.001596	0.002125	-0.696	0.04243	0.8363	0.0003267	-0.1346	0.1663	-0.0533	0.8	0.3047	-0.1919	0.2093	-0.0491	0.6941	-0.0774	0.3756	-0.317	0.08765	0.07911	-0.2754	0.04822	0.1521	0.1657
rs2684781	1	2	15	97227071	T	C	0.0297	0.6603	-0.4539	0.0008328	0.00367	-0.1659	0.05703	0.2872	0.00585	0.1295	0.1076	-0.0627	0.7056	0.2117	0.0607	0.6244	0.1923	0.08043	0.0711	0.1695	-0.299	0.004197	0.003947	-0.0915	0.1993	0.2433	0.001204
rs4984948	1	2	16	844552	C	G	2.6507	0.0001156	0.6522	0.6228	0.0001127	3.7507	9.978e-05	2.155	0.0888	0.0328	0.9709	1.2303	0.5835	0.8347	0.4374	0.6081	-0.8448	0.7026	1.6906	0.001853	0.8018	0.4824	0.001994	1.9291	0.002287	1.4149	0.198
rs577543	1	2	16	878968	A	G	0.5788	0.01365	0.281	0.5335	0.0006607	1.1464	0.0002311	0.6136	0.05021	0.0889	0.9212	6.2789	5.82e-05	0.0003874	1.2446	0.1325	-4.4273	0.00193	0.5512	0.01488	0.7216	0.09346	0.0006831	1.1582	6.972e-05	0.3877	0.1993
rs1805015	1	2	16	27281681	T	C	-0.0601	0.4203	-0.4878	0.0009545	0.004537	-0.2595	0.01115	0.1955	0.06825	0.0309	0.7008	-0.1531	0.3467	0.5949	-0.0661	0.6024	0.112	0.2968	-0.0175	0.7486	-0.3381	0.001868	0.009002	-0.1838	0.02085	0.1542	0.04073
rs11646290	1	2	16	52671763	T	C	-0.1548	0.231	-0.7332	0.006136	0.005081	-0.5542	0.0006848	0.2846	0.2104	-0.0122	0.9462	-0.1183	0.7879	0.9382	0.118	0.6923	-0.1778	0.4372	-0.1066	0.309	-0.5703	0.01195	0.02506	-0.3636	0.0126	0.0581	0.7167
rs7201	1	2	16	54097115	A	C	-0.1043	0.2561	0.6361	0.0004153	0.000869	0.1981	0.1149	-0.4808	0.0002783	-0.1046	0.3465	-0.2776	0.2187	0.2411	-0.2134	0.2134	-0.0062	0.967	-0.1044	0.1398	0.2847	0.04182	0.03592	0.0553	0.5853	-0.2753	0.005073
rs12936340	1	2	17	3439747	A	G	-0.2419	0.004319	0.4777	0.005575	0.0007786	-0.0376	0.7269	-0.5078	0.0002214	0.0442	0.6438	0.0439	0.8164	0.7991	0.0036	0.9803	0.0473	0.7199	-0.116	0.067	0.281	0.0265	0.04785	-0.0221	0.7978	-0.2222	0.01875
rs8078865	1	2	17	7896039	T	C	0.0329	0.6619	0.513	0.000629	0.00155	0.299	0.002993	-0.2695	0.01438	-0.1126	0.206	-0.0294	0.8752	0.4466	-0.1051	0.4515	-0.137	0.2655	-0.0276	0.6304	0.3036	0.009076	0.01525	0.1605	0.04917	-0.211	0.009601
rs2314810	1	2	17	23128237	C	G	0.3191	0.3447	-0.122	0.8579	0.6341	NA	NA	1.2934	1.884e-06	0.0158	0.9568	0.0391	0.9436	0.9464	0.0639	0.8845	0.0994	0.8001	0.1451	0.5106	-0.0258	0.9519	0.6951	0.0639	0.8845	0.272	0.3498
rs7215859	1	2	17	37173580	T	C	0.3083	0.007458	-0.4801	0.04621	0.001224	0.0184	0.9125	0.5635	0.0007196	-0.0912	0.5791	-0.5535	0.1268	0.3622	-0.1935	0.4429	0.0994	0.6482	0.1799	0.05586	-0.5005	0.01203	0.003668	-0.0458	0.7424	0.3948	0.00263
rs4459610	1	2	17	58938452	A	T	0.1461	0.04513	-0.3738	0.01052	0.002968	-0.0016	0.988	0.3417	0.0007943	-0.0335	0.6848	0.2357	0.1651	0.4085	0.0913	0.491	-0.1009	0.3539	0.067	0.2196	-0.1182	0.2827	0.2228	0.0341	0.6757	0.1383	0.06111
rs12949488	1	2	17	77628185	T	C	0.1617	0.02635	-0.0939	0.5175	3.96e-05	0.1072	0.2727	0.377	9.375e-08	0.0227	0.8426	-0.2033	0.4034	0.4006	-0.1005	0.5526	0.1624	0.3058	0.1217	0.04704	-0.123	0.3202	5.147e-05	0.0555	0.5116	0.3402	1.182e-07
rs1127678	1	2	17	77652776	T	C	0.1184	0.1164	-0.0086	0.9543	8.2e-05	0.1508	0.1623	0.4132	6.652e-07	0.0294	0.7493	-0.0796	0.6963	0.7798	-0.051	0.7312	0.0812	0.5005	0.0823	0.1577	-0.0311	0.7952	0.0005306	0.0812	0.352	0.3037	8.154e-06
rs683278	1	2	18	9633749	A	G	0.021	0.8057	-0.6157	0.0003981	0.001077	-0.2878	0.01934	0.3467	0.004548	-0.039	0.683	-0.2872	0.1557	0.3418	-0.1757	0.2406	0.0351	0.7704	-0.0056	0.9297	-0.476	0.0002798	0.001302	-0.2432	0.01044	0.1903	0.02547
rs11668593	1	2	19	1411473	A	G	0.0944	0.5982	1.0256	0.01291	0.0157	0.6306	0.0006543	-0.586	0.1069	0.0274	0.9219	-1.1911	0.02692	0.08323	-0.7179	0.09281	0.6267	0.108	0.0756	0.6151	0.2192	0.5008	0.2061	0.3047	0.08703	-0.0303	0.9085
rs2016503	1	2	19	15866185	T	C	-0.5549	0.0005774	0.3959	0.2148	0.0005149	-0.3802	0.102	-0.7799	0.000445	-0.3588	0.09638	0.2391	0.5755	0.0986	-0.1695	0.6041	-0.6448	0.03585	-0.4848	0.0001706	0.3395	0.1811	5.65e-05	-0.3096	0.1021	-0.7345	3.823e-05
rs8111824	1	2	19	18386104	T	G	-0.3012	0.0006505	0.149	0.4119	0.001086	-0.2326	0.05379	-0.4337	0.000629	-0.0618	0.5786	0.0106	0.9662	0.5128	0.0792	0.6425	-0.1857	0.2168	-0.209	0.002495	0.1021	0.4841	0.003627	-0.1295	0.1877	-0.3327	0.0005428
rs12971661	1	2	19	19668437	A	G	-0.5791	2.065e-05	-0.2123	0.4574	5.98e-05	-0.6537	0.000108	-0.4078	0.07772	-0.0972	0.5785	0.6127	0.1239	0.1922	0.2605	0.3913	-0.338	0.113	-0.397	0.0002158	0.0643	0.78	0.0003947	-0.4563	0.002258	-0.3705	0.01739
rs10405150	1	2	19	44079759	T	C	-0.2124	0.008376	-0.3246	0.03851	0.003025	-0.3756	0.0005009	-0.0142	0.9066	-0.0135	0.876	0.1786	0.3154	0.832	-0.0049	0.9683	-0.0336	0.7912	-0.121	0.04025	-0.1074	0.3585	0.05831	-0.2154	0.007913	-0.0231	0.7907
rs769450	1	2	19	50102284	A	G	0.0468	0.5483	0.067	0.6576	3.291e-05	0.069	0.5169	0.2781	0.0004958	0.0094	0.9289	-0.0261	0.9084	0.8236	0.0255	0.8791	0.0466	0.7446	0.0342	0.5842	0.0404	0.7464	0.000125	0.0569	0.5256	0.2207	0.001473
rs2071200	1	2	20	42464370	T	C	0.2589	0.0008344	0.2264	0.1554	0.0009775	0.3649	0.0003602	0.152	0.2055	0.1159	0.196	0.2204	0.2278	0.1606	0.3041	0.03244	-0.0538	0.6397	0.1974	0.0007477	0.2235	0.0612	0.0002587	0.3434	3.433e-05	0.0455	0.5814
rs12482262	1	2	21	26399165	A	G	-0.3637	0.01417	-0.4074	0.2355	0.006312	-0.6383	7.91e-05	0.0799	0.7807	0.1014	0.6236	0.3027	0.5672	0.7497	0.2101	0.5154	-0.1358	0.61	-0.2044	0.08943	-0.2007	0.4825	0.04318	-0.3929	0.008411	-0.0343	0.8596
rs2256331	1	2	21	26399885	T	G	-0.3434	0.0003346	0.3382	0.08731	0.001629	-0.1782	0.1323	-0.562	0.0006543	0.2807	0.001724	0.001	0.9959	0.006618	0.2471	0.07146	0.2931	0.01791	-0.0112	0.864	0.1628	0.2281	0.9846	0.0031	0.9721	-0.0206	0.8347
rs2830060	1	2	21	26407218	T	C	0.4243	0.0005805	0.0432	0.8659	0.002677	0.5009	0.0009677	0.3327	0.0981	-0.1727	0.2979	0.0549	0.877	0.5617	-0.0699	0.7889	-0.2998	0.1968	0.2105	0.0333	0.0468	0.8204	0.05894	0.311	0.0209	0.0656	0.6637
rs3787650	1	2	21	26410638	T	C	0.4274	0.006139	0.1951	0.5956	0.009222	0.6549	0.0001221	0.156	0.5917	-0.1353	0.548	-0.6839	0.2424	0.8151	-0.1449	0.6862	0.1	0.7262	0.2446	0.05619	-0.0488	0.8745	0.04286	0.4115	0.009942	0.1278	0.5277
rs2830066	1	2	21	26416073	T	C	-0.3169	0.001078	0.3331	0.08952	0.003205	-0.1516	0.2156	-0.5292	0.0009349	0.1708	0.06869	0.0501	0.8009	0.1614	0.1911	0.1905	0.1396	0.2597	-0.0653	0.3324	0.1957	0.1587	0.5261	-0.0104	0.9116	-0.1156	0.2354
rs1981326	1	2	21	26417727	A	C	-0.4658	0.002366	-0.3267	0.3752	0.001927	-0.7171	1.138e-05	-0.0612	0.8403	0.1149	0.6049	0.7486	0.1942	0.7551	0.1555	0.6624	-0.1169	0.6773	-0.2776	0.02757	-0.0202	0.9477	0.01205	-0.4755	0.001997	-0.0906	0.6583
rs2234990	1	2	21	26418053	A	T	-0.314	0.0005394	0.3665	0.0495	0.001182	-0.1559	0.1724	-0.5493	0.0003179	0.1012	0.276	0.0036	0.9853	0.5516	0.0779	0.605	0.1174	0.3293	-0.1112	0.08648	0.1981	0.142	0.2604	-0.0708	0.4364	-0.1424	0.1297
rs2073354	1	2	21	35094153	T	G	0.5133	0.05737	-0.5293	0.3409	0.002099	0.0512	0.8954	1.4301	1.525e-07	0.2167	0.4661	-1.1186	0.1036	0.3022	-0.721	0.1746	0.5988	0.09252	0.3824	0.05556	-0.7574	0.07787	0.004455	-0.2136	0.5192	1.1167	2.217e-07
rs221948	1	2	21	42506262	A	G	0.9037	0.0001304	-0.0781	0.8701	0.00067	0.9135	0.008378	1.0928	2.612e-05	0.2397	0.6575	-11.5976	2.715e-25	1.728e-21	-5.0312	3.416e-28	0.479	0.6158	0.7972	0.0002304	-1.8244	2.689e-05	1.904e-05	-1.2543	5.485e-06	0.8533	0.005249
rs3827225	1	2	21	42523848	A	G	0.2083	0.0745	0.7473	0.004051	0.001541	0.4823	0.0002943	-0.2579	0.2592	0.0445	0.7675	0.2596	0.4763	0.7752	0.1623	0.4726	0.0591	0.7817	0.1477	0.1088	0.5851	0.005413	0.003175	0.3996	0.0004905	-0.0906	0.5589
rs2013275	1	2	21	45158900	T	C	-0.0173	0.8187	0.0286	0.8457	0.01426	-0.0071	0.9463	-0.2171	0.000981	-0.0502	0.5534	-0.1412	0.424	0.5317	-0.1367	0.3094	-0.015	0.8941	-0.0325	0.5639	-0.041	0.7153	0.03762	-0.0561	0.4966	-0.1647	0.00368
rs652987	1	2	22	25056366	A	G	0.2071	0.005862	0.3108	0.04523	0.002191	0.3344	0.0007035	0.0242	0.8384	0.0055	0.9557	-0.1251	0.5485	0.8093	-0.0713	0.6578	0.0233	0.8514	0.1335	0.02567	0.1567	0.205	0.02037	0.2242	0.00763	0.0239	0.7794
rs5749162	1	2	22	29486296	A	G	-0.3137	0.001296	0.3953	0.054	0.001334	-0.1462	0.2515	-0.5323	0.0008149	-0.0638	0.5047	-0.145	0.4794	0.7312	-0.099	0.4933	-0.038	0.7652	-0.1868	0.006167	0.1291	0.3708	0.02658	-0.1256	0.1885	-0.2339	0.01786
rs4253653	1	2	22	44947566	T	G	0.0837	0.4845	1.0196	7.757e-05	0.0001515	0.6846	0.0008757	-0.3506	0.02042	0.6483	0.01013	0.3491	0.5601	0.04354	0.7878	0.08433	0.5422	0.06111	0.1861	0.08451	0.9164	9.612e-05	0.0002088	0.703	0.0001738	-0.1638	0.2168
rs4253731	1	2	22	44989431	A	G	0.338	0.001809	-0.2929	0.1853	0.00142	0.1788	0.2721	0.5004	0.0006524	-0.186	0.197	0.1607	0.5825	0.2892	-0.0084	0.9705	-0.3319	0.06642	0.1506	0.08149	-0.1297	0.4591	0.1653	0.117	0.3755	0.1741	0.1237
